1 Lungs contribute to solving the frog's cocktail party problem by  
2 enhancing the spectral contrast of conspecific vocal signals

3

4 Short title: Frogs' lungs help them hear better

5

6 N. Lee<sup>1</sup>, J. Christensen-Dalsgaard<sup>2</sup>, L. A. White<sup>3,†</sup>, K. M. Schrode<sup>4</sup>, and M. A. Bee<sup>3,4,\*</sup>

7

8 <sup>1</sup> Department of Biology, St. Olaf College, Northfield, MN 55057, USA.

9 <sup>2</sup> Department of Biology, University of Southern Denmark, 5230 Odense M, Denmark.

10 <sup>3</sup> Department of Ecology, Evolution, and Behavior, University of Minnesota - Twin Cities, St.  
11 Paul, MN 55108, USA.

12 <sup>4</sup> Graduate Program in Neuroscience, University of Minnesota - Twin Cities, Minneapolis, MN  
13 55455, USA.

14

15 Abstract: Noise impairs signal perception and is a major source of selection on animal  
16 communication. Identifying adaptations that enable receivers to cope with noise is critical to  
17 discovering how animal sensory and communication systems evolve. We integrated biophysical  
18 and bioacoustic measurements with physiological modeling to demonstrate that the lungs of  
19 frogs serve a heretofore unknown noise-control function in vocal communication. Lung  
20 resonance enhances the signal-to-noise ratio for communication by selectively reducing the  
21 tympanum's sensitivity at critical frequencies where the tuning of two inner ear organs overlaps.  
22 Social network analysis of citizen-science data on frog calling behavior indicates the calls of  
23 other frog species in multi-species choruses are a prominent source of environmental noise  
24 attenuated by the lungs. These data reveal that an ancient adaptation for detecting sound via the  
25 lungs has been evolutionarily co-opted to create spectral contrast enhancement that contributes to  
26 solving a multi-species cocktail party problem.

---

† Current address: National Socio-Environmental Synthesis Center (SESYNC), Annapolis, MD 21401, USA.

\* Corresponding author: [mbee@umn.edu](mailto:mbee@umn.edu)

## 27 **INTRODUCTION**

28 Environmental noise is a major source of selection that shapes the evolution of animal sensory  
29 and communication systems (1, 2). Noise creates problems for effective acoustic communication  
30 by increasing signal detection thresholds, disrupting source localization and sound pattern  
31 recognition, and impairing auditory discrimination. There is widespread and increasing interest  
32 in understanding how animals are adapted to cope with noise problems (1, 2), particularly in  
33 light of the recent global rise in anthropogenic noise pollution (3). For many insects (4), frogs  
34 (5), and birds (6) that signal acoustically in large and often multi-species aggregations, the  
35 signals of other individuals represent particularly potent sources of environmental noise that  
36 reduce the signal-to-noise ratio for communication. In essence, such species must solve multi-  
37 species analogs of the human “cocktail party problem,” which refers to our difficulty  
38 communicating with speech in noisy crowds (7, 8). At present, knowledge of the potential  
39 diversity of adaptations for solving noise problems among nonhuman animals remains limited.

40         Frogs represent key taxa for discovering evolved solutions to noise problems (5, 9, 10).  
41 Among terrestrial vertebrates, acoustic communication evolved independently in frogs some 200  
42 million years ago (11), probably soon after the independent evolution during the Triassic of a  
43 tympanic middle ear in the lineage leading to modern frogs (12). Vocal communication is  
44 fundamental to reproduction in most extant frogs. Male frogs aggregate in dense breeding  
45 “choruses,” often comprising multiple species, where they produce sexual signals termed  
46 “advertisement calls” to attract mates and repel rivals (5, 9, 10). Advertisement calls are  
47 produced at notoriously high sound amplitudes, with peak sound pressure levels (SPL) exceeding  
48 100 dB (at 1 m) in many species (9). Consequently, frog choruses are often characterized by high  
49 and sustained levels of background noise that may be audible to humans from distances of up to  
50 2 km (5). Within the cacophony of a chorus, female frogs must select and locate a mate based on  
51 evaluating the advertisement calls of different males (9). Chorus noise and the overlapping calls  
52 of conspecific and heterospecific males can negatively impact auditory perception and degrade  
53 the acoustically-guided mating decisions of females (5).

54         Amphibians are unique among vertebrates in having inner ears with two physically  
55 distinct sensory papillae that transduce different frequency ranges of airborne sounds (9). In  
56 frogs, the two organs are considered “matched filters” in the spectral domain because they are  
57 most sensitive to one or more spectral components in conspecific advertisement calls (9). The

58 tympanic middle ears of frogs are internally coupled through the mouth cavity via wide and open  
59 Eustachian tubes (Fig. 1A) (13, 14). Thus, each tympanum's response reflects the summation of  
60 sound impinging directly on its external surface and sound reaching its internal surface via input  
61 through the opposite, internally coupled tympanum (13). In frogs, sound can also reach the  
62 internal surface of each tympanum through the body wall and air-filled lungs via the glottis,  
63 mouth, and Eustachian tubes (Fig. 1B) (15-19). Prior to the evolutionary origins of tympanic  
64 middle ears, sound induced vibration of air-filled lungs was a likely mechanism of sound  
65 reception in the earliest amphibian ancestors of all tetrapods (20). Among extant terrestrial  
66 vertebrates, however, the lung-to-ear sound transmission pathway is unique to amphibians.  
67 During the respiratory cycle, frog lungs remain continuously pressurized above atmospheric  
68 pressure, and they remain inflated for relatively long periods punctuated by brief episodes of  
69 ventilation when pulmonary air is expelled through the glottis and then refilled using an active  
70 pump mechanism driven by buccal musculature (18, 21). Thus, during normal respiration, there  
71 is a strong coupling between the lungs and the air-filled tympanic middle ears of frogs. Existing  
72 hypotheses for the function of the lung-to-ear pathway include protecting a male frog's hearing  
73 during vocalization (14) and sharpening the inherent directionality of their internally coupled  
74 ears (15-19); however, these functions are not yet well understood, and the hypothesis that the  
75 lungs improve localization of conspecific signals remains controversial (13, 22).

76 Here, we tested a novel hypothesis for the function of the frog's lung-to-ear sound  
77 transmission pathway: frog's lungs improve the signal-to-noise ratio for vocal communication by  
78 creating *spectral contrast enhancement* (SCE). Spectral contrast refers to the difference in  
79 amplitude (in dB) between the "peaks" and "valleys" in a sound spectrum. In the context of  
80 human hearing and speech communication, signal processing algorithms for SCE can be used to  
81 amplify the formant frequencies (peaks) of voiced speech sounds or attenuate frequencies  
82 between adjacent formants (valleys) (23-25). SCE can improve speech perception in noise for  
83 hearing impaired listeners when implemented as part of the signal processing strategies of  
84 hearing aids and cochlear implants (23-25). The hypothesis that frogs' lungs function in creating  
85 SCE stems from early qualitative reports that tympanic sensitivity can vary as a function of lung  
86 inflation (16-18). The SCE hypothesis predicts that sound transmission through inflated lungs to  
87 the middle ears has one or both of two effects on hearing in frogs. It could selectively augment  
88 the ability of sound frequencies emphasized in conspecific advertisement calls to drive vibrations

89 of the tympanum. Alternatively, it could selectively reduce the tympanum's sensitivity to non-  
90 call frequencies that may be characteristic of sources of environmental noise. We tested these  
91 two predictions using the American green treefrog (*Hyla cinerea*; Hylidae), a species in which  
92 males call to attract females in noisy breeding choruses, often with multiple other frog species,  
93 and females choose their mate based on perceived features of his calls.

94

## 95 **RESULTS**

96

### 97 **Inflated lungs selectively reduce tympanum vibrations to non-call frequencies**

98 We used laser vibrometry to assess the impacts of lung inflation on the tympanum's sensitivity  
99 across the frequency spectrum and across the horizontal sound field. Using temporarily  
100 immobilized females as subjects, we compared the vibration amplitudes of the tympanum in  
101 response to free-field acoustic stimulation by broadcasting a frequency modulated (FM) sweep  
102 from each of 12 sound incidence angles surrounding the animal (Fig. S1A). Measurements were  
103 repeated with the lungs in a naturally inflated state and after manual deflation of the lungs ( $n =$   
104 21; Fig. 1C). The tympanum was most responsive to frequencies between about 1000 and 5000  
105 Hz (Figs. 2A, 2B, S1A). However, in response to frequencies in the range of 1400 to 2200 Hz,  
106 tympanum vibration amplitude was substantially reduced, on average by 4 to 6 dB, when the  
107 lungs were inflated compared with the deflated state (Fig. 2C). Within this frequency range, the  
108 maximum reduction in tympanum vibration amplitude, averaged across individuals (mean  $\pm$  95%  
109 CI), was  $10.0 \pm 1.8$  dB (range: 3.3 to 17.4 dB) and was significantly nonzero (two-tailed, one-  
110 sample t test:  $t_{20} = 10.91$ ,  $p < 0.001$ ). While the reduction in vibration amplitude spanned the  
111 frontal hemifield (Fig. 2C), its bandwidth and magnitude were larger when sound originated  
112 from within the contralateral portion of the frontal hemifield (i.e., between  $0^\circ$  and  $-90^\circ$ ). The  
113 modal and median sound incidence angles corresponding to the maximum reduction in  
114 tympanum vibration amplitude were  $-60^\circ$  and  $-30^\circ$ , respectively.

115 We found no evidence that inflated lungs selectively augment the ability of frequencies  
116 emphasized in conspecific advertisement calls to drive the tympanum. Similar to other frogs in  
117 the genus *Hyla* (9), male green treefrogs produce an advertisement call with a frequency  
118 spectrum consisting of two prominent spectral peaks that are analogous to the formant  
119 frequencies present in human vowel sounds (26). The low-frequency peak is important for long-

120 distance communication (27) and source localization (28, 29), whereas the high-frequency peak  
121 appears to be more important in female mate choice (27, 30). In a sample of 457 advertisement  
122 calls ( $\cong$  20 calls from each of 23 males), the mean ( $\pm$  SD) frequencies of the two peaks were 834  
123  $\pm$  14 Hz and 2730  $\pm$  34 kHz (Fig. 3A). It is worth noting that the mean ( $\pm$  SD) frequency of the  
124 prominent valley in the frequency spectrum between these two spectral peaks was 1653  $\pm$  39 Hz,  
125 which falls within the range of frequencies (1400 to 2200 Hz) where inflated lungs reduce  
126 tympanic sensitivity (Fig. 3A). At the two spectral peaks of conspecific calls, the tympanum's  
127 vibration amplitude did not vary as a function of lung inflation. Across angles of sound  
128 incidence, the mean ( $\pm$  95 CI) magnitude of the tympanum response at frequencies of 834 Hz  
129 and 2730 Hz differed between the inflated and deflated lung states by  $0.7 \pm 1.8$  dB (Fig. 3B) and  
130  $0.8 \pm 1.8$  dB (Fig. 3C), respectively; these mean values were not significantly different from zero  
131 (two-tailed, one-sample t tests:  $t_{20} = 0.8$  and  $t_{20} = 0.9$ , respectively,  $p_s > 0.393$ ). Overall, there  
132 was little evidence that inflated lungs augmented the tympanum's response at any specific  
133 combinations of frequency and location. Tympanum responses were slightly higher (by 1.3 to 2.7  
134 dB on average) at frequencies between 900 and 1500 Hz, but only in a restricted part of the  
135 contralateral sound field behind the animal, between about  $-90^\circ$  and  $-180^\circ$  (Fig. 2C). Other lung-  
136 mediated increases in tympanum sensitivity were similarly small and occurred at high  
137 frequencies (e.g., between 6000 and 7000 Hz; Fig. 2C) at which both the tympanum and the  
138 peripheral auditory nervous system are not very responsive (cf. Figs. 2A, 2B, S1A) (31, 32).

139 Together, these data suggest the inflated lungs of frogs function in creating a directionally  
140 tuned "notch filter" at the level of the tympana that attenuates a narrow range of sound  
141 frequencies predominantly within each contralateral frontal field. Because of this selectivity, the  
142 tympanum's sensitivity to the spectral peaks of vocal signals was independent of the state of lung  
143 inflation. In fact, the spectrum of the advertisement call has a prominent valley that lacks sound  
144 energy at the very frequencies impacted by the lungs.

145

### 146 **Lung resonance generates a directionally tuned tympanic notch filter**

147 Because the frog's lungs are large air-filled cavities overlain by a relatively thin body wall, they  
148 resonate in response to free-field acoustic stimulation (15, 19). We hypothesized that the lungs'  
149 resonance functions in generating the notch filter that selectively reduces the tympanum's  
150 sensitivity. This hypothesis predicts that the peak resonance frequency of the lungs should

151 correspond closely to the frequency range of reduced tympanum sensitivity observed when the  
152 lungs are inflated (1400 to 2200 Hz) and that the resonance of the lungs should have a  
153 subtractive effect on the tympanum's response within this frequency range.

154 Biophysical measurements revealed that the lungs exhibit a prominent resonance that  
155 corresponds closely to the frequency range of the lung-mediated reduction in tympanum  
156 sensitivity. We used laser vibrometry to quantify the vibration amplitude of the body wall  
157 overlying the lungs in response to free-field acoustic stimulation by an FM sweep broadcast from  
158 an ipsilateral position ( $n = 10$ ; Fig S1B). The measured lung resonance had a mean ( $\pm$  95% CI)  
159 peak frequency of  $1558 \pm 89$  Hz (range: 1400 Hz to 1850 Hz) and mean ( $\pm$  95% CI) 10-dB down  
160 points of  $1244 \pm 76$  Hz and  $1906 \pm 151$  Hz (Fig. 4A). There was a significant negative  
161 correlation between peak resonance frequency and body size, as expected if lung volume varies  
162 directly with body size (Fig. S2; two-tailed Pearson  $r = -0.705$ ,  $R^2 = 0.498$ ,  $p = 0.0228$ ). After  
163 manually deflating the lungs, the mean ( $\pm$  95% CI) magnitude of the peak resonance frequency  
164 was attenuated by  $57.6 \pm 6.0$  dB and was significantly lower than the magnitude measured in the  
165 inflated condition (Fig. 4A; two-tailed, one-sample  $t$  test:  $t_9 = 18.7$ ,  $p < 0.0001$ ). Following  
166 manual reinflation of the lungs, the mean ( $\pm$  95% CI) peak frequency of the lung resonance was  
167 restored ( $1627 \pm 98$  Hz; range: 1450 Hz to 1928 Hz) and did not differ from that measured in the  
168 inflated state (Fig. 4A; two-tailed, paired  $t$  test:  $t_9 = 1.88$ ,  $p = 0.0922$ ). These laser measurements,  
169 thus, confirmed that under free-field acoustic stimulation, the resonance frequency of inflated  
170 lungs corresponds closely to the frequency range of reduced tympanum vibrations when the  
171 lungs are inflated.

172 We tested the prediction that inflated lungs have a frequency-specific subtractive effect  
173 by comparing reconstructions of the tympanum's free-field response with the lungs inflated  
174 versus deflated. To do so, we used local acoustic stimulation (Fig. S1C) to quantify the  
175 transmission gain (TG) of indirect sound input to the internal surface of the tympanum via the  
176 inflated lungs ( $TG_L$ ) and the contralateral tympanum ( $TG_C$ ) (33). Transmission gain represents a  
177 relative measure of how efficiently each indirect sound input is coupled to the tympanum. At  $TG$   
178 = 0 dB, sounds impinge on the internal and external surfaces of the tympanum with equal  
179 amplitudes and interact depending on their relative phases; negative values indicate sound  
180 reaches the internal surface of the tympanum at a relatively lower amplitude. The median peak  
181  $TG_L$  occurred at 1430 Hz (Fig 4B;  $n = 6$  individuals), which falls within the range of the lung's

182 peak resonance frequencies measured with free-field acoustic stimulation (1400 Hz to 1850 Hz;  
183 cf. Fig. 4A). The peak  $TG_L$  was -13 dB (i.e., 13 dB lower) compared with the direct sound input  
184 to the tympanum's external surface. The median peak  $TG_C$  occurred at 1852 Hz and was -6 dB  
185 (i.e., 6 dB lower) compared to direct sound input to the tympanum's external surface (Fig. 4B).

186 Reconstructed tympanic responses to free-field stimulation exhibited the predicted lung-  
187 mediated reduction in vibration amplitude in the range of 1400 to 2200 Hz (Fig. 4C). Responses  
188 in the deflated state were reconstructed after excluding the lung input from all computations. To  
189 reconstruct responses with inflated lungs, we explored a range of transmission gain weightings  
190 for  $TG_L$  because local stimulation of the body wall (Fig. S1C) underestimates its real magnitude  
191 due to the much larger surface area of the body wall exposed to sound during free-field  
192 stimulation. At a  $TG_L$  weighting of  $4\times$ , tympanum responses reconstructed for the inflated lung  
193 condition were reduced, relative to the deflated condition, by approximately 4 to 6 dB at  $-60^\circ$   
194 in the frequency range of 1400 to 2200 Hz. This reduction is similar in magnitude to that observed  
195 in measured free-field responses (Fig. 4C). When this lung-mediated effect was modeled across  
196 additional angles of sound incidence, differences in the tympanum's reconstructed free-field  
197 responses between the inflated and deflated states revealed broad patterns consistent with those  
198 determined with free-field acoustic stimulation: tympanum sensitivity was reduced within the  
199 frequency range of 1400 to 2200 Hz when the lungs were inflated, and these reductions were  
200 most pronounced at contralateral angles (cf. Figs. 2C and 4D). A transmission gain weighting of  
201  $4\times$  for  $TG_L$  corresponds to a lung transmission gain amplitude that is 12 dB higher than the  
202 unweighted value of -13 dB reported above. Our reconstructions, therefore, suggest the peak  
203 transmission gain from the lungs is probably closer to -1 dB relative to the direct sound input to  
204 the tympanum's external surface and +5 dB relative to the peak transmission gain amplitude  
205 from the contralateral tympanum (Fig. 4B). Hence, sound transmission to the internal surface of  
206 the tympanum through the lungs is quite substantial and, at the lung resonance frequency, it is  
207 nearly equivalent in magnitude to direct sound stimulation of the tympanum's external surface.

208 Together, bioacoustic and biophysical measurements, combined with reconstructing free-  
209 field responses, provide direct evidence that the lung resonance generates a directionally tuned  
210 "notch filter" that attenuates the contralateral portion of each tympanum's frontal field response  
211 within a narrow range of frequencies between 1400 to 2200 Hz. But how might lung mediated  
212 notch filtering function in hearing and sound communication? To answer this question, we

213 examined the lungs' impacts on tympanic responses in relation both to a physiological model of  
214 peripheral frequency tuning in frogs and to the frequency spectra of common sources of  
215 environmental noise.

216

### 217 **Lung mediated notch filtering sharpens peripheral frequency tuning**

218 We modeled peripheral frequency tuning in green treefrogs by estimating frequency tuning  
219 curves as 4th order gammatone filters that we parameterized using published data on best  
220 excitatory frequencies, bandwidths, and thresholds for 172 auditory nerve fibers in this species  
221 (31) (Fig. 5). Separate populations of auditory nerve fibers innervating the amphibian papilla are  
222 tuned to low frequencies (up to about 700 Hz) and mid-range frequencies (up to about 1300 Hz),  
223 whereas a third population of auditory nerve fibers innervating the basilar papilla is more  
224 consistently tuned to a common range of higher frequencies (Fig. 5). Consistent with the notion  
225 of matched filtering in the spectral domain, the thresholds of auditory nerve fibers innervating  
226 the amphibian and basilar papillae are lowest at frequencies matching, respectively, the low-  
227 frequency and high-frequency spectral peaks in the advertisement call (Fig. 5).

228         The key finding revealed by this physiological model is that lung-mediated impacts on  
229 tympanic sensitivity occur in the frequency range where the tuning of the amphibian and basilar  
230 papillae can overlap (Fig. 5). At low amplitudes near threshold, neither inner ear papilla responds  
231 to frequencies between 1400 and 2200 Hz. However, the bandwidth of individual auditory nerve  
232 fibers broadens considerably at higher sound levels more typical of communication in natural  
233 environments, ultimately causing the tuning of the two inner ear papillae to overlap (32, 34).  
234 Much of the frequency range of overlap between the amphibian and basilar papillae at high  
235 sound levels corresponds to the frequency range (1400 to 2200 Hz) where notch filtering by  
236 inflated lungs reduces the tympanum's vibration amplitude (Fig. 5). Given this correspondence,  
237 the modeled tuning of auditory nerve fibers reveals two possible mechanisms by which the  
238 subtractive notch filtering generated by inflated lungs could function to counteract the negative  
239 impacts of environmental noise in the frequency range of 1400 to 2200 Hz.

240         First, inflated lungs would reduce energetic masking of conspecific advertisement calls.  
241 Consistent with behavioral studies (34) and recordings of auditory brainstem responses (32),  
242 auditory nerve fibers innervating both the mid-frequency region of the amphibian papilla and the  
243 basilar papilla are predicted to respond to frequencies in the range of 1400 to 2200 Hz at high



244 amplitudes typical of communication. By selectively reducing the sensitivity of the tympanum,  
245 notch filtering by inflated lungs would reduce the ability of environmental noise in this  
246 frequency range to drive auditory nerve responses that could otherwise mask neural responses to  
247 conspecific calls. Second, notch filtering by inflated lungs would reduce two-tone rate  
248 suppression along the amphibian papilla. Two-tone rate suppression is a well-known feature of  
249 auditory processing in vertebrates (35), including green treefrogs (36, 37), whereby neural  
250 responses to one frequency are suppressed by the addition of a second frequency. In green  
251 treefrogs, suppressible auditory nerve fibers with best frequencies between approximately 500  
252 and 700 Hz respond to the low-frequency component of conspecific calls at the high amplitudes  
253 typical of communication (Fig. 5). Importantly, these fibers are suppressed by simultaneous  
254 sound energy between approximately 1400 and 2000 Hz (see Fig. 5 *inset*) (36, 37). Thus, notch  
255 filtering that selectively attenuates the tympanum's response in this frequency range should  
256 additionally reduce two-tone rate suppression of excitatory neural responses to conspecific calls.

257 Our physiological model suggests lung mediated notch filtering functions generally to  
258 sharpen peripheral frequency tuning in the range of 1400 to 2200 Hz. This interpretation is  
259 consistent with the SCE hypothesis: by selectively attenuating the tympanum's response to  
260 frequencies in the valley between the peaks in the conspecific call spectrum, inflated lungs  
261 improve the "match" of the peripheral matched filter to frequencies in conspecific signals. This  
262 improved match should both reduce energetic masking and two-tone rate suppression that could  
263 otherwise impair neural processing of the spectral peaks of conspecific advertisement calls,  
264 thereby increasing the neuronal signal-to-noise ratio for communication. A wider band of notch  
265 filtering would interfere with tympanic transmission of the spectral peaks in conspecific calls. An  
266 important remaining question, therefore, is what sources of environmental noise in the range of  
267 1400 to 2200 Hz would be attenuated by lung mediated notch filtering?

268

### 269 **Lung mediated notch filtering improves the signal-to-noise ratio for communication**

270 For frogs that call in multi-species choruses, the calls of other species breeding at the same times  
271 and places represent prominent and behaviorally relevant sources of environmental noise that can  
272 interfere with communication (5, 9). Therefore, we evaluated the extent to which the calls of  
273 syntopically breeding heterospecific frogs constitute environmental noise in the frequency range  
274 attenuated by the lungs. To this end, we integrated analyses of continent-scale citizen science

275 data from the North American Amphibian Monitoring Program (NAAMP) (38) with bioacoustic  
276 analyses of archived recordings of frog calls. NAAMP was a long-term (1994-2015) effort to  
277 monitor frog populations using roadside calling surveys conducted across 26 states that  
278 encompass most of the green treefrog geographic range in the eastern, central, and southern  
279 United States. In the NAAMP dataset, there were 19,809 reports of “co-calling” between green  
280 treefrogs and a total of 42 other species, meaning these 42 species were observed to call at the  
281 same times and places as our focal species (Fig. S3).

282 Social network analysis revealed that just 10 of the 42 co-calling heterospecific species  
283 (i.e., 24% of all co-calling species) accounted for the overwhelming majority (79%) of the  
284 19,809 observed instances of co-calling between green treefrogs and one or more other species in  
285 the NAAMP dataset (Figs. 6 and S3). Of these top-10 heterospecific species, half (i.e., just 5 of  
286 42 total heterospecific species) accounted for 42% of all instances of co-calling and produce  
287 advertisement calls with prominent spectral peaks falling in the range of 1400 to 2200 Hz (Fig.  
288 6). One of these five species, for example, is Fowler’s toad (*Anaxyrus fowleri*), which produces a  
289 long, loud call with a single spectral peak in the range of 1400 to 2200 Hz (Fig. 6). Others of  
290 these five species, such as the barking treefrog (*Hyla gratiosa*), the North American bullfrog  
291 (*Lithobates catesbeianus*), and the green frog (*Lithobates clamitans*) produce calls with bimodal  
292 spectra in which one of two spectral components falls within the range of 1400 to 2200 Hz (Fig.  
293 6). We selected these five species’ calls for further investigation.

294 To model the impacts of lung mediated notch filtering on the tympanum’s response to  
295 these five species’ calls, we passed the spectra of their advertisement calls through simulated  
296 tympanic filters corresponding to 0° (frontal) and -30° and -60° (contralateral) with the lungs  
297 inflated versus deflated. We then computed the difference in the tympanum’s predicted vibration  
298 amplitude between states of lung inflation at the spectral peak of each heterospecific species’  
299 calls within or closest to the range of 1400 to 2200 Hz. Consistent with a functional role in noise  
300 reduction, the notch filtering generated by inflated lungs reduced the tympanum vibration  
301 amplitude in response to the relevant spectral peaks of these five species’ calls by approximately  
302 4 to 6 dB (Fig. 6; Table S1). The greatest lung-mediated reductions in tympanic responses in the  
303 range of 1400 to 2200 Hz occurred for the calls of green frogs (*L. clamitans*), bullfrogs (*L.*  
304 *catesbeianus*), and barking treefrogs (*H. gratiosa*) (Fig. 6; Table S1). Notably, bullfrogs and  
305 green frogs co-called with green treefrogs most frequently in the NAAMP dataset, with these

306 two heterospecific species accounting for 26% of all reported instances of co-calling. Barking  
307 treefrogs are the sister species of green treefrogs. The costs of hybrid matings with barking  
308 treefrogs have driven evolutionary change in the spectral preferences of female green treefrogs  
309 (39); therefore, mitigating the risk of mis-mating could be one additional benefit of the lungs'  
310 impacts on tympanic responses. Taken together, these data are consistent with the interpretation  
311 that SCE created by lung mediated notch filtering improves the signal-to-noise ratio for  
312 communication by selectively reducing the tympanum's sensitivity to prominent sources of  
313 environmental noise that include the calls of heterospecific frog species in multi-species  
314 choruses.

315

## 316 **DISCUSSION**

317 Resonances of air-filled structures such as lungs or swim bladders improve sound  
318 detection in aquatic vertebrates (40), and sound detection via the lungs also played important  
319 roles in hearing during the evolutionary transition of vertebrates from water to land (20). Thus, it  
320 is likely that the lungs of the earliest terrestrial vertebrates functioned as accessory sound  
321 receiving structures prior to the subsequent evolution of tympanic middle ears (12) and acoustic  
322 communication (11). Our data suggest evolution has co-opted this ancient adaptation for sound  
323 reception through the lungs to provide spectral contrast enhancement that improves the signal-to-  
324 noise ratio for communication in modern frogs. The inflated lungs of female green treefrogs act  
325 as resonators that reduce the tympanum's sensitivity to sounds occurring within a narrow but  
326 biologically important range of frequencies. This frequency range, which falls precisely in the  
327 valley between the two spectral peaks of the species-specific advertisement call, encompasses  
328 frequencies that are transduced by both inner ear papillae and that are used by some of the most  
329 frequently encountered heterospecifics in multi-species frog choruses. In essence, inflated lungs  
330 enhance spectral contrast by sharpening the peripheral matched filter. In turn, inflated lungs  
331 should improve the signal-to-noise ratio for vocal communication by reducing energetic masking  
332 and two-tone rate suppression by sources of environmental noise that potentially interfere with  
333 processing conspecific calls. Thus, frogs' lungs help them solve a multi-species cocktail party  
334 problem.

335 This study's support of the SCE hypothesis suggests the lungs in one major clade of  
336 tetrapods serve a heretofore unknown noise-control function in vertebrate hearing and sound

337 communication. Moreover, the impact of the frog's inflated lungs on its tympanum vibrations  
338 bears striking similarity to SCE in the field of human hearing and speech communication (23-  
339 25). People with sensorineural hearing loss have difficulties understanding speech in noisy social  
340 settings that stem, in part, from having broader auditory filters (i.e., reduced frequency  
341 selectivity). SCE algorithms can produce a 2 to 4 dB increase in the signal-to-noise ratio that  
342 yields significant improvements in word recognition and response times in hearing impaired  
343 listeners (24). Some SCE algorithms that improve speech recognition for cochlear implant users  
344 do so by attenuating the valleys between the peaks of formant frequencies in the speech spectrum  
345 without altering the levels of the peaks themselves (23). This human engineering solution is  
346 functionally similar to how inflated lungs impact tympanic sensitivity in frogs: the state of lung  
347 inflation had no impact on the formant-like spectral peaks present in conspecific calls, but  
348 inflated lungs attenuated (by up to 10 dB on average) the tympanum's response to frequencies in  
349 the valley between them. Notably, lung-mediated notch filtering occurred in the frequency region  
350 (1400 to 2200 Hz) where, at high sound levels, the spectral tuning of the separate inner ear  
351 organs is broader and frequency selectivity is reduced. In a closely related treefrog, even large  
352 changes in lung volume (e.g., 66.7% reduction) yielded no change in the magnitude of the lung's  
353 resonance and produced only a small change (e.g., 100 Hz increase) in the peak resonance  
354 frequency (16). These findings suggest the acoustical properties of the lung input probably  
355 change very little over the respiratory cycle. Hence, the lung-to-ear transmission pathway in  
356 frogs provides a stable biophysical mechanism for real-time SCE that begins at the tympanum  
357 itself. In green treefrogs, such a mechanism should have the effect of enhancing call recognition,  
358 though testing this mechanism directly may be impossible due to the difficulty of manipulating  
359 lung volume in behaving animals engaged in call recognition tasks. Previous work, however,  
360 lends indirect support to the operation of such a mechanism, as call recognition is enhanced  
361 when both spectral peaks are present and degraded when additional spectral peaks in the range of  
362 1400 to 2200 Hz are artificially added to calls (26, 37).

363 A mechanism for SCE might be particularly beneficial to frogs by mitigating negative  
364 impacts of the environmental noise created by the calls of other species in a multi-species chorus.  
365 Because accurate perception of sexual signals is often tightly linked to evolutionary fitness,  
366 species that communicate acoustically in multi-species breeding aggregations can be under  
367 intense selection to solve cocktail-party-like problems (1, 2, 4-7). The negative impacts of

368 auditory masking caused by background noise and overlapping signals should, thus, favor the  
369 evolution of adaptive mechanisms that promote more efficient communication in noise. Results  
370 from this study suggest the frog's lung-to-ear sound transmission pathway functions as a novel  
371 receiver adaptation to mitigate problems of auditory masking that might be particularly  
372 detrimental to effective communication in multi-species choruses.

373 Our results also resolve a longstanding paradox in research on comparative vertebrate  
374 hearing. Previous studies of frogs (13, 16-18), including green treefrogs (22), indicate that the  
375 lung-to-ear sound transmission pathway sharpens the tympanum's inherent directional tuning at  
376 frequencies corresponding to the lung resonance frequency, but that it has very little (if any)  
377 impact on directionality at the signal frequencies used for social and sexual communication with  
378 conspecifics. That the frog's lungs improve directional hearing at frequencies not used for  
379 communication has remained paradoxical, because increased directionality at conspecific call  
380 frequencies would presumably confer selective advantages in the dark and physically complex  
381 environment of a nighttime chorus by improving a receiver's ability to locate sources of  
382 conspecific calls (e.g., potential mates). A pattern observed but not considered in earlier studies  
383 (16-18) is that lung-mediated improvements in directionality occur because the tympanum's  
384 sensitivity was reduced to sound frequencies near the lung's peak resonance frequency in a  
385 direction dependent manner. Our findings resolve the apparent paradox by emphasizing that it is  
386 the frequency-dependent, lung-mediated decrease in tympanic sensitivity – and not the  
387 associated increase in directionality – that plays a functional role in hearing and sound  
388 communication.

389 In conclusion, we propose that natural selection has acted, at least in some frog species,  
390 to exploit the lung-to-ear coupling to facilitate perception of conspecific calls in noisy  
391 environments by providing a mechanism for real-time spectral contrast enhancement in the  
392 auditory periphery. That the frog's lungs play a role in spectral contrast enhancement  
393 significantly broadens our understanding of the diversity of evolutionary adaptations to noise  
394 problems in nonhuman animals as well as the function of a unique sound transmission pathway  
395 in one of the most vocal groups of extant vertebrates.

396  
397

## 398 **MATERIALS AND METHODS**

399

### 400 **Animals**

401 Subjects were 25 female green treefrogs collected on the grounds of the East Texas Conservation  
402 Center in Jasper County, Texas, U.S.A. (30°56'46.15"N, 94°7'51.46"W). Animals were housed  
403 in the laboratory on a 12-hour photoperiod, provided with access to perches and refugia, fed a  
404 diet of vitamin-dusted crickets, and given ad libitum access to fresh water. All procedures were  
405 approved by the Institutional Animal Care and Use Committees of the University of Minnesota  
406 (#1401-31258A) and complied with the NIH *Guide for the Care and Use of Laboratory Animals*  
407 (8<sup>th</sup> Edition).

408

### 409 **Laser vibrometry measurements**

410 We took laser measurements of 25 frogs (SVL: mean = 54.0 mm, range = 47.7 to 59.2 mm;  
411 mass: mean = 12.5 g, range = 8.3 to 17.6 g). For laser measurements, subjects were immobilized  
412 with succinylcholine chloride (5 µg/g). Over the 5-10 minutes during which the immobilizing  
413 agent took effect, subjects were allowed to regulate their own lung volume. After full  
414 immobilization was achieved, lung ventilation had stopped and lung inflation (based on body  
415 wall extension) resembled that observed for unmanipulated frogs sitting in a natural posture (41).  
416 We refer to this state of lung inflation as “inflated.” For some procedures, we also examined  
417 animals in one or two additional states of lung inflation that involved manually deflating and  
418 reinflating the lungs. To create a “deflated” condition, we expressed the air in the animal’s lungs  
419 by gently depressing the lateral body wall while holding the glottis open with the narrow end of a  
420 small, plastic pipette tip. We created a “reinflated” condition by gently blowing air by mouth  
421 through a pipette with its tip located just above the closed glottis; the movement of air was  
422 sufficient to open the glottis and inflate the lungs. We made every attempt to return the lungs to  
423 the natural level of inflation observed prior to manual deflation. When individuals were  
424 measured in multiple conditions, we always made measurements in the inflated condition first  
425 followed by the deflated condition and then the reinflated condition. While animals were  
426 immobilized, we periodically applied water to the dorsum to keep the skin moist to facilitate  
427 cutaneous respiration. All laser measurements of an individual subject were made during a single  
428 recording session of less than two hours. (Note that temporary manipulations of lung ventilation

429 are possible in immobilized frogs because amphibians are capable of cutaneous gas exchange.)  
430 We excluded four animals from further analyses (final  $n = 21$ ) because we could not visually  
431 confirm their state of lung inflation across treatments.

432 We conducted our experiments in a custom-built, semi-anechoic sound chamber with  
433 inside dimensions (L  $\times$  W  $\times$  H) of 2.9 m  $\times$  2.7 m  $\times$  1.9 m (Industrial Acoustics Company, North  
434 Aurora, IL). To reduce reverberations inside the chamber, the walls and ceiling were lined with  
435 Sonex acoustic foam panels (Model VLW-60; Pinta Acoustic, Inc. Minneapolis, MN). The floor  
436 of the chamber was covered in low-pile carpet. During recordings, subjects were positioned on a  
437 30-cm tall pedestal made from wire mesh (0.9-mm diameter wire, 10.0-mm grid spacing). The  
438 tip of the subject's mandible rested on a raised arch of thin wire, so that the animal sat in a  
439 typical posture in the horizontal plane with its jaw parallel to the ground and its head raised and  
440 in line with its body. The bottom of the pedestal was suspended 90 cm above the floor of the  
441 chamber using a horizontal, 70-cm long piece of Unistrut<sup>®</sup> attached to its base (Unistrut, Harvey,  
442 IL). The Unistrut beam was mounted to a vibration isolation table (Technical Manufacturing  
443 Corporation, Peabody, MA) located against an inside wall of the chamber. The Unistrut and  
444 vibration isolation table were covered with the same acoustic foam that lined the walls and  
445 ceiling of the chamber.

446 We measured the vibration amplitude of the animal's right tympanum or body wall using  
447 a laser vibrometer (PDV-100, Polytech, Irvine, CA). The laser was mounted on the same  
448 vibration isolation table from which the subject pedestal was mounted. We positioned the laser at  
449 approximately 70° to the animal's right relative to the direction in which its snout pointed, which  
450 we consider to be 0° (Fig. S1). To enhance reflectance of the laser, a small (45 – 63  $\mu$ m  
451 diameter), retroreflective glass bead (P-RETRO-500, Polytech, Irvine, CA) was placed at the  
452 center of the right tympanum and a position on the right, lateral body wall overlying the lung.  
453 The analogue output of the laser was acquired (44.1 kHz, 16 bit) using an external digital and  
454 analogue data acquisition (DAQ) device (NI USB 6259, National Instruments, Austin, TX) that  
455 was controlled by custom software written in MATLAB (v.2014a, MathWorks, Natick, MA) and  
456 running on an OptiPlex 745 PC (Dell, Round Rock, TX). The spectra of the acquired laser  
457 signals were calculated in MATLAB using the pwelch function (window size = 256, overlap =  
458 50%). Laser spectra were corrected for small directional variation in the sound spectrum by  
459 subtracting (in dB) the spectrum recorded from a probe microphone from that of the acquired

460 laser signal. In generating heatmaps of tympanum responses (e.g., Fig. 2), we used linear  
461 interpolation to determine vibration amplitude values at angles of sound incidence between those  
462 measured. Data between measurement points in polar plots were interpolated using a cubic  
463 spline.

464

### 465 **Free-field acoustic stimulation**

466 Acoustic stimuli (44.1 kHz, 16-bit) were broadcast using the same software and hardware used to  
467 acquire the laser signal. We controlled signal levels for calibration and playback using a  
468 programmable attenuator (PA5, Tucker-Davis Technologies, Alachua, FL). The stimulus  
469 consisted of a frequency-modulated (FM) sweep that was 195 ms in duration, had linear onset  
470 and offset ramps of 10 ms, and linearly increased in frequency from 0.2 to 7.5 kHz over the 175-  
471 ms steady-state portion of its amplitude envelope. Responses were averaged over 20 repetitions  
472 of the stimulus. During measurements with the laser, we also recorded acoustic stimuli by  
473 positioning the tip of a probe tube of a G.R.A.S. 40SC probe microphone (G.R.A.S. Sound &  
474 Vibration A/S, Holte, Denmark) approximately 2 mm from the position on the animal's body  
475 (e.g., the right tympanum or its right body wall) from which the laser recorded the response. The  
476 microphone's output was amplified using an MP-1 microphone pre-amplifier (Sound Devices,  
477 Reedsburg, WI) and recorded using the NIDAQ device.

478 For free-field acoustic stimulation (Fig. S1A, S1B), the stimulus was amplified (Crown  
479 XLS1000, Elkhart, IN) and broadcast through a speaker (Mod1, Orb Audio, New York, NY)  
480 located 50 cm away from the approximate center of a subject's head (measured along the  
481 interaural axis) as it sat on the pedestal. The speaker was attached to a rotating arm covered in  
482 acoustic phone and suspended from the ceiling of the sound chamber so that the center of the  
483 speaker was at the same height above the chamber floor as the subject and could be placed at any  
484 azimuthal position. We presented the stimulus from 12 different angles around the animal (0° to  
485 330° in 30° steps; Fig. S1A). An angle of 0° corresponded to the direction in which the animal's  
486 snout pointed, +90 corresponded to the animal's right side (ipsilateral to the laser), and -90°  
487 corresponded to the animal's left side (contralateral to the laser). For a given subject, we first  
488 recorded responses from the tympanum in the inflated condition. We began recordings at a  
489 randomly determined location around the subject and then recorded responses at each successive  
490 angle after repositioning the speaker in a counterclockwise direction. After making a recording



491 from the 12th and final speaker location, we deflated the lungs and remeasured the tympanum  
492 beginning at the same randomly determined starting location used in the naturally inflated  
493 condition. For a subset of 10 subjects (SVL: mean = 54.4 mm, range = 47.7 to 59.2 mm; mass:  
494 mean = 13.1 g, range = 8.3 to 17.6 g), we also measured the vibration amplitude of the body wall  
495 overlying the lungs in the inflated and deflated states, as well as after manually reinflating the  
496 lungs, with the speaker positioned at +90°. We calibrated the FM sweep to be 85 dB SPL (sound  
497 pressure level re 20 µPa, fast, C-weighted) for each speaker position using a Brüel & Kjær Type  
498 2250 sound level meter (Brüel & Kjær Sound & Vibration Measurement A/S, Nærum, Denmark)  
499 and a Brüel & Kjær Type 4189 ½-inch condenser microphone. For calibration, we suspended the  
500 microphone from the ceiling of the sound chamber by an extension cable (AO-0414-D-100) so  
501 that it hung at the position a subject's head occupied during recordings.

502

### 503 **Transmission gain measurements and free-field reconstructions**

504 We used laser vibrometry and local acoustic stimulation of the tympana and body wall to  
505 measure the transmission gain of sound input to the tympanum's internal surface via the  
506 internally coupled tympanum and the lungs. For local acoustic stimulation (Fig. S1C), we  
507 broadcast the same FM sweep used in free-field stimulations through a Sony MDREX15LP  
508 earbud (Sony Corporation of America, New York, NY) positioned within approximately 2 mm  
509 of either the right tympanum (ipsilateral to the laser), the left tympanum (contralateral to the  
510 laser), or the left body wall overlying the left lung (contralateral to the laser) (Fig. S1C). The  
511 opening of the earbud was approximately the same diameter as the tympanum. The earbud was  
512 positioned using micromanipulators attached to a ring stand placed on the floor of the sound  
513 chamber. The tip of a metal probe tube connected to the G.R.A.S. 40SC probe microphone was  
514 inserted through the hybrid silicone of the earbud such that its opening barely protruded into the  
515 space between the speaker and the acoustically stimulated tympanum or body wall. The output of  
516 the probe microphone was amplified with the MP-1 microphone preamplifier and recorded with  
517 the NIDAQ data acquisition device. At each location of stimulation, we determined the mean  
518 vibration amplitude averaged over response to 20 repetitions of the stimulus with the lungs in the  
519 inflated condition.

520 Transmission gains were computed as follows. For each location of stimulation (Fig.  
521 S1C), we first computed a transfer function by dividing the average vibration spectrum of the

522 right (ipsilateral) tympanum's response recorded with the laser by the average sound spectrum at  
523 each location recorded with the probe microphone. Thus, separate transfer functions were  
524 computed for stimulation of the right tympanum (ipsilateral to the laser;  $H_I(\omega)$ ), the left  
525 tympanum (contralateral to the laser;  $H_C(\omega)$ ), and the body wall above the lung (contralateral to  
526 the laser;  $H_L(\omega)$ ). From these transfer functions, we then computed the transmission gain for  
527 sound input to the internal surface of the ipsilateral tympanum via the contralateral tympanum as  
528  $TG_C = H_C(\omega) / H_I(\omega)$  and via the lung-to-ear pathway as  $TG_L = H_L(\omega) / H_I(\omega)$ .

529         Transfer functions measured with local acoustic stimulation allowed us to reconstruct the  
530 tympanum's free-field response to sound. To accomplish this, we added the sounds arriving at  
531 the tympanum's internal surface via the internally coupled, contralateral tympanum and via the  
532 lung-to-ear pathway to the sound measured at the external surface the tympanum. The sound  
533 arriving via the contralateral tympanum was computed as the sound impinging on the external  
534 surface of the contralateral tympanum (measured with the probe microphone) multiplied by the  
535 transmission gain of the contralateral tympanum ( $TG_C$ ). The sound arriving via the lung-to-ear  
536 pathway was computed as the sound impinging on the body wall (measured with the probe  
537 microphone) multiplied by the transmission gain of the lung-to-ear pathway as ( $TG_L$ ). Sound  
538 spectra were converted to complex numbers such that all addition was done vectorially and, thus,  
539 the resulting sum depended on both the amplitude and phase of each frequency. This sum of  
540 sound inputs was then multiplied by the transfer function of the ipsilateral tympanum ( $H_I(\omega)$ ) to  
541 arrive at the predicted free-field transfer function. A range of weightings for  $TG_L$  ( $1\times$  to  $6\times$ ) were  
542 explored in reconstructing free-field responses because local acoustic stimulation underestimates  
543 the real magnitude of  $TG_L$  due to the smaller surface area of the body wall that is stimulated  
544 compared with free-field acoustic stimulation.

545

## 546 **Bioacoustic analyses**

547 We made acoustic recordings of green treefrogs in their natural habitat during active breeding  
548 choruses. Between 15 May and 3 July 2013, we recorded 457 advertisement calls from 23 males  
549 that were calling in ponds at the East Texas Conservation Center. These recordings (44.1 kHz, 16  
550 bit) were made between 2300 and 0200 hours using a Marantz PMD670 recorder (Marantz  
551 America, LLC., Mahwah, NJ) and handheld Sennheiser ME66/K6 microphone (Sennheiser  
552 USA, Old Lyme CT) held approximately 1 m from the focal animal. Male green treefrogs had a

553 mean ( $\pm$  SD) snout-to-vent length (SVL) of  $51.6 \pm 3.9$  mm and were recorded at a mean air  
554 temperature of  $20.3 \pm 3.0$  °C. Recordings of green frogs (*Lithobates clamitans*) (42) and  
555 bullfrogs (*Lithobates catesbeianus*) (43) were obtained during previous studies by one of the  
556 authors (MAB); the calls of the remaining eight frog species included in this study were obtained  
557 from the Macaulay Library at the Cornell Lab of Ornithology. For each species, we analyzed 6 to  
558 23 calls per male (median = 20 calls per male) for each of 9 to 25 males (median = 20 males per  
559 species) by computing the power spectrum of each call using MATLAB's pwelch function  
560 (window size = 256, overlap = 50%). We determined the average call spectrum for a species by  
561 first averaging over the calls recorded from each individual and then over all individuals. Only  
562 recordings that were of sufficiently high signal-to-noise ratio and free from excessive  
563 background noise were included in these analyses.

564

### 565 **Model of peripheral frequency selectivity**

566 We modeled frequency selectivity in green treefrogs by creating a bank of hypothetical  
567 excitatory frequency tuning curves for 172 auditory nerve fibers. The shape of each modeled  
568 tuning curve, plotted as a thin line in Fig. 5, was determined as a 4th order gammatone filter (44-  
569 46). The best sensitivity of each modeled tuning curve was adjusted to match the best excitatory  
570 frequency and threshold for a given nerve fiber based on previously published results reported in  
571 Fig. 1B of Ehret and Capranica (31). The bandwidth of each modeled tuning curve was estimated  
572 using the best-fit regression line for  $Q_{10dB}$  as a function of threshold [computed based on data  
573 from Fig. 2B in Ehret and Capranica (31)] to derive a predicted value of  $Q_{10dB}$  for each  
574 combination of best excitatory frequency and threshold. This estimate was used to compute the  
575 corresponding bandwidth 10 dB above threshold for each modeled tuning curve. (The joint  
576 relationship between best excitatory frequency, threshold, and bandwidth was not reported  
577 directly by Ehret and Capranica for (31) individual nerve fibers.)

578

### 579 **Social network analysis of calling survey data**

580 To generate frog species co-calling networks, we utilized a publicly available dataset from the  
581 North American Amphibian Monitoring Program (NAAMP) (38, 47). Created as a citizen  
582 science collaboration between the United States Geological Survey (USGS) and a collection of  
583 state agencies, universities, and non-profit organizations, NAAMP was a long-term effort to

584 monitor frog populations across 26 states in the eastern, central, and southern United States  
585 based on roadside calling surveys conducted by trained observers. Details about survey methods  
586 can be found elsewhere (38, 47). The NAAMP database consists of 319,765 observations of 57  
587 identified species made during 21,934 roadside calling surveys conducted between 18 April 1994  
588 and 9 August 2015. Fifteen of the 18 states encompassing the geographic range of green  
589 treefrogs, which are most abundant in the south-eastern United States, were included in the  
590 NAAMP dataset; therefore, coverage was high of geographic areas where green treefrogs were  
591 most likely to be heard calling. While the NAAMP dataset does not localize co-calling species  
592 precisely to the same body of water or close physical proximity, it represents the best (and only)  
593 measure of which other frog species might reasonably be expected to generate environmental  
594 noise for a green treefrog receiver in multi-species choruses across its geographic range on a  
595 continent-wide scale.

596 To create the co-calling network, we defined a node as a frog species and an edge as an  
597 event where both species were reported as calling during the same observation period (typically  
598 3 min in duration) on the same date at the same survey stop at the same time. From networks  
599 containing only species co-occurring with green tree frogs (Figs. 6, S3), we identified the top ten  
600 co-callers by selecting those with the ten highest edge weights. We analyzed networks with and  
601 without the inclusion of any species complexes that were not resolved to individual species in the  
602 NAAMP dataset (e.g., *Pseudacris feriarum/fouquettei* complex). When using green treefrogs as  
603 the focal species, inclusion or exclusion of species complexes did not alter the top ten co-calling  
604 species identified. To aid in visualization of the network for Fig. 6, we took the square root of the  
605 raw edge weights and scaled this quantity by a factor of 15. All network analyses and images  
606 were generated in the *igraph* package in R (Version 3.3.2)(48).

607

## 608 **Statistical analyses**

609 Unless indicated otherwise, a significance criterion of  $\alpha = 0.05$  was used. Two-tailed, one-sample  
610 t tests were used to test null hypotheses that there were no differences in tympanum vibration  
611 amplitude in response to free-field acoustic stimulation between the inflated and deflated states  
612 of lung inflation ( $n = 21$ ). A two-tailed Pearson correlation was used to investigate the  
613 relationship between the peak frequency of the lungs in the inflated state and snout-to-vent  
614 length ( $n = 10$ ). We used a two-tailed, paired-sample t test of the null hypothesis that deflating

615 the lungs would not change the magnitude of the peak frequency of the lung's resonance ( $n =$   
616 10). A two-tailed, paired-sample t test was used to directly compare the magnitudes of the  
617 resonance peak of the lungs in the inflated and reinflated states of inflation ( $n = 10$ ). We also  
618 used two-tailed, one-sample t tests of the hypothesis that mean magnitudes of reduction in  
619 tympanum sensitivity were nonzero for three sound incidence angles ( $0^\circ$ ,  $-30^\circ$ , and  $-60^\circ$ ) for each  
620 of five heterospecific species (15 comparisons total;  $n = 21$  individuals for each comparison). All  
621 15 comparisons remained significant after using the Holm-Šídák test to control for multiple  
622 comparisons; unadjusted P values are reported in Table S1.

623

## 624 **SUPPLEMENTARY MATERIALS**

625

626 Fig. S1. Laser vibrometry was used to measure the vibration amplitudes of the right tympanum  
627 and right body wall overlying the lung in response to acoustic stimulation.

628

629 Fig. S2. Frog lungs are size-dependent resonators.

630

631 Fig. S3. Social network analysis of data from the North American Amphibian Monitoring  
632 Program (NAAMP) identified 42 heterospecific, co-calling species.

633

634 Table S1. Lung-mediated reductions in the tympanum's response to frequencies in heterospecific  
635 calls.

636

## 637 **REFERENCES AND NOTES**

- 638 1. H. Brumm, Ed., *Animal Communication and Noise*, (Springer, New York, 2013), pp. 453.
- 639 2. R. H. Wiley, *Noise Matters: The Evolution of Communication*. (Harvard University  
640 Press, Cambridge, MA, 2015), pp. 520.
- 641 3. D. M. Dominoni *et al.*, Why conservation biology can benefit from sensory ecology.  
642 *Nature Ecology & Evolution* **4**, 502-511 (2020).
- 643 4. H. Römer, in *Animal Communication and Noise*, H. Brumm, Ed. (Springer, New York,  
644 2013), pp. 33-63.
- 645 5. M. A. Bee, Treefrogs as animal models for research on auditory scene analysis and the  
646 cocktail party problem. *International Journal of Psychophysiology* **95**, 216-237 (2015).
- 647 6. G. M. Klump, in *Psychological Mechanisms in Animal Communication*, M. A. Bee, C. T.  
648 Miller, Eds. (Springer, Cham, Switzerland, 2016), chap. 3, pp. 57-88.

- 649 7. M. A. Bee, C. Micheyl, The cocktail party problem: What is it? How can it be solved?  
650 And why should animal behaviorists study it? *Journal of Comparative Psychology* **122**,  
651 235-251 (2008).
- 652 8. J. H. McDermott, The cocktail party problem. *Current Biology* **19**, R1024-R1027 (2009).
- 653 9. H. C. Gerhardt, F. Huber, *Acoustic communication in insects and anurans: common*  
654 *problems and diverse solutions*. (Chicago University Press, Chicago, 2002), pp. 531.
- 655 10. A. S. Feng, J. Schul, in *Hearing and Sound Communication in Amphibians*, P. A. Narins,  
656 A. S. Feng, R. R. Fay, A. N. Popper, Eds. (Springer, New York, 2007), pp. 323-350.
- 657 11. Z. Chen, J. J. Wiens, The origins of acoustic communication in vertebrates. *Nature*  
658 *Communications* **11**, 1-8 (2020).
- 659 12. J. A. Clack, E. Allin, in *Evolution of the Vertebrate Auditory System*, G. A. Manley, A.  
660 N. Popper, R. R. Fay, Eds. (Springer, New York, 2004), vol. 22, pp. 128-163.
- 661 13. M. A. Bee, J. Christensen-Dalsgaard, Sound source localization and segregation with  
662 internally coupled ears: The treefrog model. *Biological Cybernetics* **110**, 271-290 (2016).
- 663 14. P. M. Narins, ICE on the road to auditory sensitivity reduction and sound localization in  
664 the frog. *Biological Cybernetics* **110**, 263-270 (2016).
- 665 15. P. M. Narins, G. Ehret, J. Tautz, Accessory pathway for sound transfer in a neotropical  
666 frog. *Proceedings of the National Academy of Sciences of the United States of America*  
667 **85**, 1508-1512 (1988).
- 668 16. M. B. Jørgensen, Comparative studies of the biophysics of directional hearing in anurans.  
669 *Journal of Comparative Physiology A* **169**, 591-598 (1991).
- 670 17. M. B. Jørgensen, H. C. Gerhardt, Directional hearing in the gray tree frog *Hyla*  
671 *versicolor*: Eardrum vibrations and phonotaxis. *Journal of Comparative Physiology A*  
672 **169**, 177-183 (1991).
- 673 18. M. B. Jørgensen, B. Schmitz, J. Christensen-Dalsgaard, Biophysics of directional hearing  
674 in the frog *Eleutherodactylus coqui*. *Journal of Comparative Physiology A* **168**, 223-232  
675 (1991).
- 676 19. G. Ehret, E. Keilwerth, T. Kamada, The lung-eardrum pathway in three treefrog and four  
677 dendrobatid frog species: Some properties of sound transmission. *Journal of*  
678 *Experimental Biology* **195**, 329-343 (1994).
- 679 20. C. B. Christensen, J. Christensen-Dalsgaard, P. T. Madsen, Hearing of the African  
680 lungfish (*Protopterus annectens*) suggests underwater pressure detection and rudimentary  
681 aerial hearing in early tetrapods. *The Journal of Experimental Biology* **218**, 381-387  
682 (2015).
- 683 21. H. De Jongh, C. Gans, On the mechanism of respiration in the bullfrog, *Rana*  
684 *catesbeiana*: A reassessment. *J. Morphol.* **127**, 259-289 (1969).
- 685 22. J. Christensen-Dalsgaard, N. Lee, M. A. Bee, Lung-to-ear sound transmission does not  
686 improve directional hearing in green treefrogs (*Hyla cinerea*). *bioRxiv*, (2020).
- 687 23. W. Nogueira, T. Rode, A. Buchner, Spectral contrast enhancement improves speech  
688 intelligibility in noise for cochlear implants. *Journal of the Acoustical Society of America*  
689 **139**, 728-739 (2016).
- 690 24. T. Baer, B. C. Moore, S. Gatehouse, Spectral contrast enhancement of speech in noise for  
691 listeners with sensorineural hearing impairment: Effects on intelligibility, quality, and  
692 response times. *Journal of Rehabilitation Research and Development* **30**, 49-72 (1993).

- 693 25. A. M. Simpson, B. C. J. Moore, B. R. Glasberg, Spectral enhancement to improve the  
694 intelligibility of speech in noise for hearing-impaired listeners. *Acta Oto-Laryngol*, 101-  
695 107 (1990).
- 696 26. N. Lee, K. M. Schrode, M. A. Bee, Nonlinear processing of a multicomponent  
697 communication signal by combination-sensitive neurons in the anuran inferior colliculus.  
698 *Journal of Comparative Physiology A* **203**, 749-772 (2017).
- 699 27. H. C. Gerhardt, Significance of two frequency bands in long distance vocal  
700 communication in the green treefrog. *Nature* **261**, 692-694 (1976).
- 701 28. J. Rheinlaender, H. C. Gerhardt, D. D. Yager, R. R. Capranica, Accuracy of phonotaxis  
702 by the green treefrog (*Hyla cinerea*). *Journal of Comparative Physiology* **133**, 247-255  
703 (1979).
- 704 29. G. M. Klump, J. H. Benedix, H. C. Gerhardt, P. M. Narins, AM representation in green  
705 treefrog auditory nerve fibers: Neuroethological implications for pattern recognition and  
706 sound localization. *Journal of Comparative Physiology A* **190**, 1011-1021 (2004).
- 707 30. H. C. Gerhardt, Mating call recognition in the green treefrog (*Hyla cinerea*): Importance  
708 of two frequency bands as a function of sound pressure level. *Journal of Comparative*  
709 *Physiology* **144**, 9-16 (1981).
- 710 31. G. Ehret, R. R. Capranica, Masking patterns and filter characteristics of auditory nerve  
711 fibers in the green treefrog (*Hyla cinerea*). *Journal of Comparative Physiology* **141**, 1-12  
712 (1980).
- 713 32. N. P. Buerkle, K. M. Schrode, M. A. Bee, Assessing stimulus and subject influences on  
714 auditory evoked potentials and their relation to peripheral physiology in green treefrogs  
715 (*Hyla cinerea*). *Comparative Biochemistry and Physiology A* **178**, 68-81 (2014).
- 716 33. J. Christensen-Dalsgaard, G. A. Manley, Acoustical coupling of lizard eardrums. *Journal*  
717 *of the Association for Research in Otolaryngology* **9**, 407-416 (2008).
- 718 34. H. C. Gerhardt, Acoustic spectral preferences in two cryptic species of grey treefrogs:  
719 Implications for mate choice and sensory mechanisms. *Animal Behaviour* **70**, 39-48  
720 (2005).
- 721 35. M. B. Sachs, E. D. Young, R. H. Lewis, Discharge patterns of single fibers in the pigeon  
722 auditory nerve. *Brain Research* **70**, 431-447 (1974).
- 723 36. G. Ehret, A. J. M. Moffat, R. R. Capranica, Two-tone suppression in auditory nerve  
724 fibers of the green treefrog (*Hyla cinerea*). *Journal of the Acoustical Society of America*  
725 **73**, 2093-2095 (1983).
- 726 37. H. C. Gerhardt, G. Höbel, Mid-frequency suppression in the green treefrog (*Hyla*  
727 *cinerea*): mechanisms and implications for the evolution of acoustic communication.  
728 *Journal of Comparative Physiology A* **191**, 707-714 (2005).
- 729 38. T. M. Foreman, E. H. C. Grant, L. A. Weir, in *U.S. Geological Survey data release*.  
730 (2017).
- 731 39. G. Höbel, H. C. Gerhardt, Reproductive character displacement in the acoustic  
732 communication system of green tree frogs (*Hyla cinerea*). *Evolution* **57**, 894-904 (2003).
- 733 40. A. N. Popper, R. R. Fay, Rethinking sound detection by fishes. *Hearing research* **273**,  
734 25-36 (2011).
- 735 41. M. S. Caldwell *et al.*, Spatial hearing in Cope's gray treefrog: II. Frequency-dependent  
736 directionality in the amplitude and phase of tympanum vibrations. *Journal of*  
737 *Comparative Physiology A* **200**, 285-304 (2014).

- 738 42. M. Bee, C. Kozich, K. Blackwell, H. Gerhardt, Individual variation in advertisement calls  
739 of territorial male green frogs, *Rana clamitans*: Implications for individual discrimination.  
740 *Ethology* **107**, 65-84 (2001).
- 741 43. M. Bee, H. Gerhardt, Neighbour-stranger discrimination by territorial male bullfrogs  
742 (*Rana catesbeiana*): I. Acoustic basis. *Animal Behaviour* **62**, 1129-1140 (2001).
- 743 44. N. Lee, J. L. Ward, A. Véléz, C. Micheyl, M. A. Bee, Frogs exploit statistical regularities  
744 in noisy acoustic scenes to solve cocktail-party-like problems. *Current Biology* **27**, 743-  
745 750 (2017).
- 746 45. R. D. Patterson, I. Nimmo-Smith, J. Holdsworth, P. Rice, in *A Meeting of the IOC Speech*  
747 *Group on Auditory Modelling at RSRE*. (1987), vol. 2.
- 748 46. V. Hohmann, Frequency analysis and synthesis using a Gammatone filterbank. *Acta*  
749 *Acustica united with Acustica* **88**, 433-442 (2002).
- 750 47. L. A. Weir, M. J. Mossman, in *Amphibian Declines: Conservation Status of United States*  
751 *Species*, M. J. Lannoo, Ed. (University of California Press, Berkeley, 2005), pp. 307-313.
- 752 48. G. Csardi, T. Nepusz, The igraph software package for complex network research.  
753 *InterJournal, Complex Systems* **1695**, 1-9 (2006).
- 754 49. H. C. Gerhardt, Sound pressure levels and radiation patterns of vocalizations of some  
755 North American frogs and toads. *Journal of Comparative Physiology* **102**, 1-12 (1975).
- 756 50. J. C. Tanner, M. A. Bee, Within-individual variation in sexual displays: signal or noise?  
757 *Behavioral Ecology* **30**, 80-91 (2019).
- 758

759 **Acknowledgments:** We thank C. Gerhardt and Marlene Zuk for helpful feedback on the  
760 manuscript; J. Tanner and M. Elson for help collecting frogs; and S. Gupta for assistance with  
761 animal husbandry; and Gary Calkins and the Texas Parks and Wildlife Division for permission to  
762 collect frogs under Scientific Permit Number SPR-0410-054; **Funding:** Funding was provided  
763 by a grant from the U.S. National Science Foundation to M.A.B (IOS-1452831); **Author**  
764 **contributions:** N.L. collected and analyzed laser vibrometry data, wrote custom software for  
765 acquiring laser vibrometry data, conducted the bioacoustics analyses, and co-wrote the  
766 manuscript; J.C-D. collected and analyzed data and edited the manuscript, L.A.W. conducted the  
767 social network analysis, provided relevant text, and edited the manuscript; K.M.S. made  
768 recordings of frogs in the field and edited the manuscript; and M.A.B. conceived and led the  
769 project, secured funding, collected and analyzed data, and co-wrote the manuscript; **Competing**  
770 **interests:** Authors declare no competing interests; and **Data and materials availability:** The  
771 datasets generated and analyzed during the current study will be made available before  
772 publication in the Data Repository for the University of Minnesota  
773 (<https://conservancy.umn.edu/handle/11299/166578>) and are available to reviewers and editors  
774 upon request from the corresponding author. All code and data used to generate the social  
775 network figures are available at: <https://github.com/whit1951/FrogNetworks>.



**Figure 1**

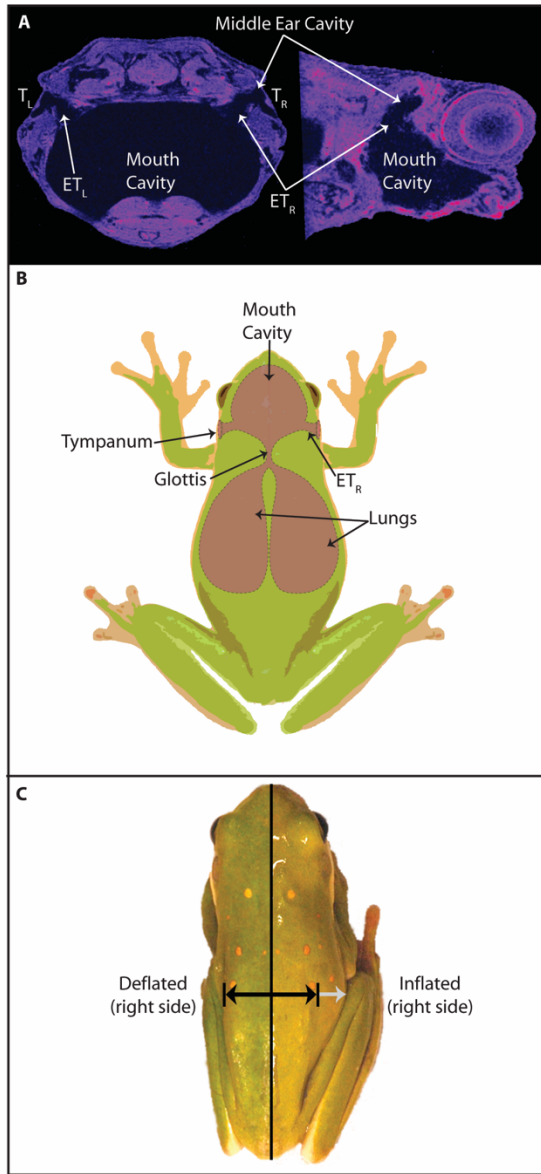

**Fig. 1. Sound transmitted via the lungs reaches the internal surfaces of the frog's internally coupled tympana. (A)** Magnetic resonance images (coronal, left; sagittal, right) of a green treefrog head showing the internal coupling of the left (L) and right (R) tympana (T) and air-filled middle ear cavities through the Eustachian tubes (ET) and mouth cavity. **(B)** Schematic illustration showing the coupling of the lungs through the glottis to the internally coupled tympana. **(C)** A split image of a female green treefrog showing the lateral extension of her right body wall in the inflated (non-reflected right half of image) and deflated (reflected left half of image) states of lung inflation. Black arrows depict the lateral extension of the female's right body wall in the deflated state, and the light gray arrow depicts the additional lateral extension of the right body wall in the inflated condition.

**Figure 2**

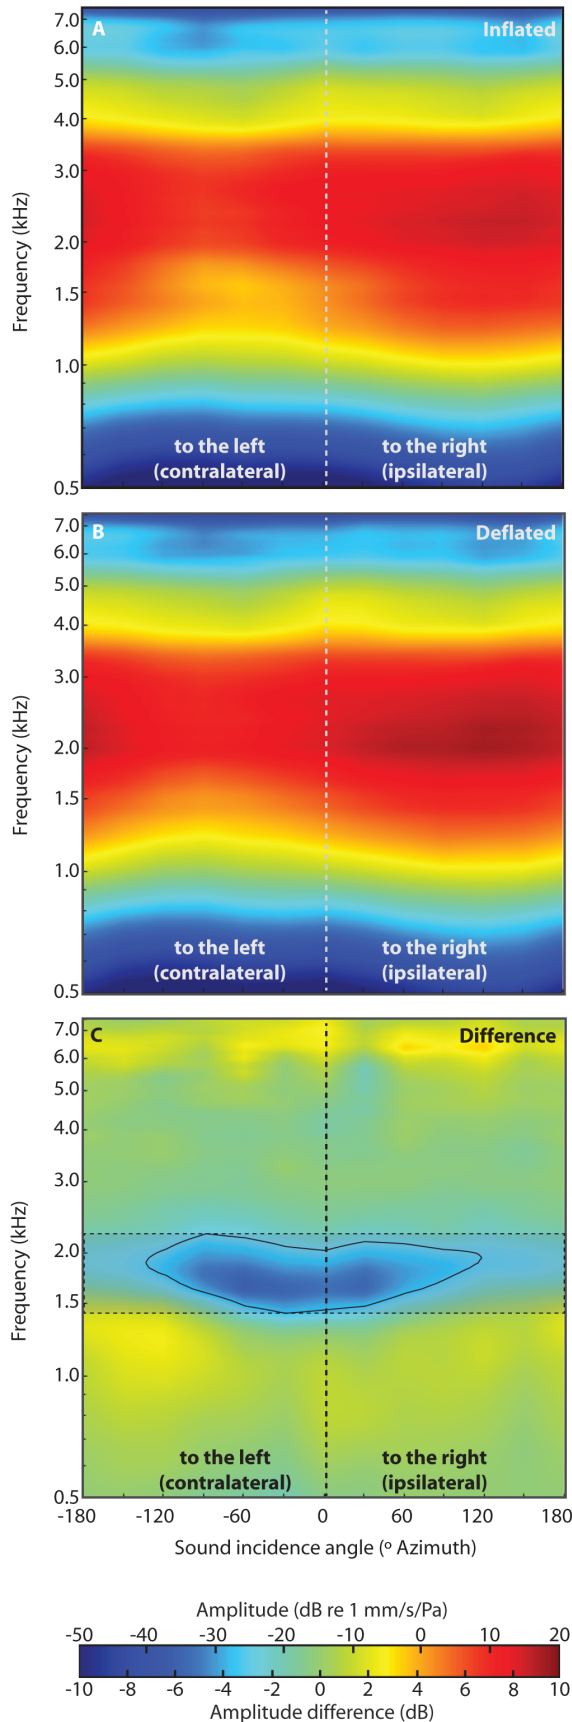

**Fig. 2. Inflated lungs selectively reduce tympanum vibrations in the frequency range of 1400 to 2200 Hz. (A-B)** Heatmaps showing the mean vibration amplitudes of the right tympanum measured using laser vibrometry in response to free-field acoustic stimulation by an FM sweep presented from each of 12 sound incidence angles ( $0^\circ$  to  $\pm 180^\circ$  in  $30^\circ$  steps) surrounding the animal (Fig. S1A). Measurements were repeated in the inflated (A) and deflated (B) states of lung inflation ( $n = 21$  individuals). (C) Heatmap showing the mean differences between the vibration amplitudes of the tympanum in the inflated and deflated states of lung inflation (inflated – deflated) across frequency and sound incidence angle ( $n = 21$  individuals). The black contour encloses frequencies and angles where inflated lungs reduced vibration amplitudes by  $\geq 4$  dB. The minimum and maximum frequencies enclosed by the contour are 1400 Hz and 2200 Hz, respectively. The dashed lines and shaded box enclose frequencies between 1400 Hz and 2200 Hz across all angles and are reproduced in subsequent figures.

**Figure 3**

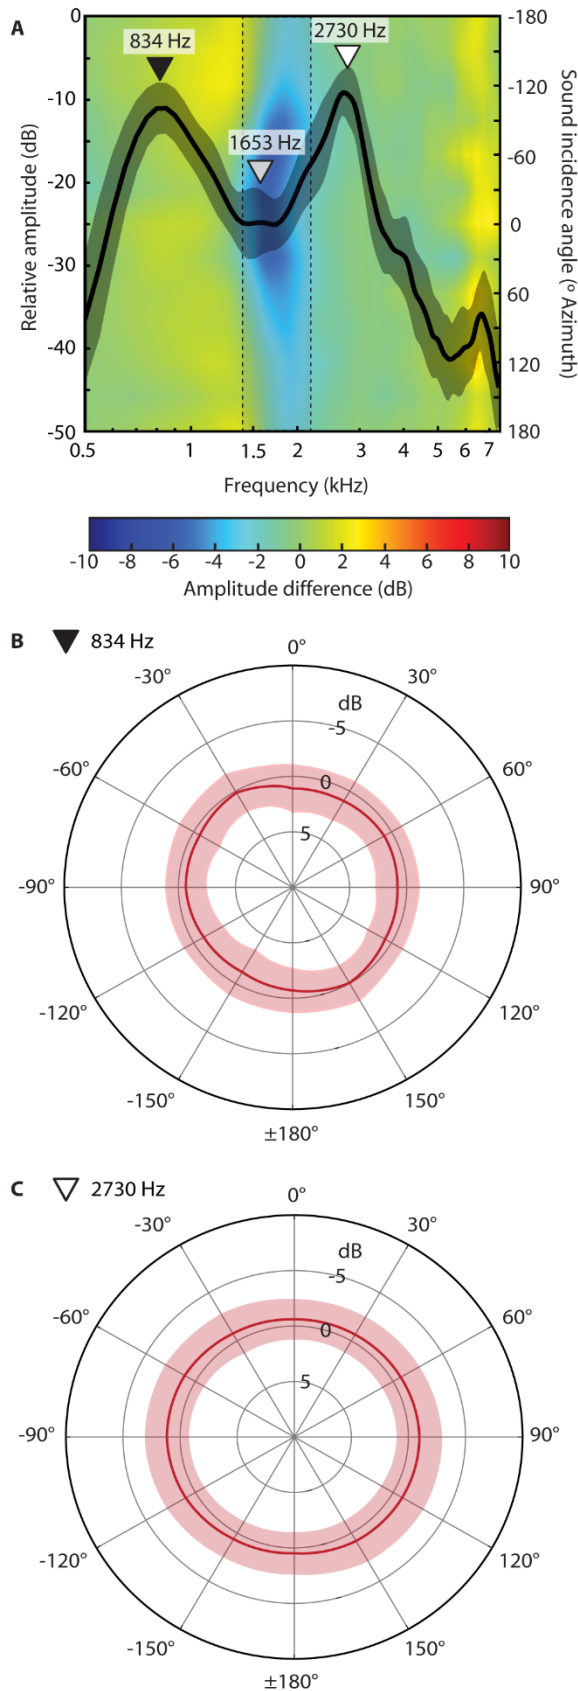

**Fig. 3. Inflated lungs selectively reduce tympanum vibrations to non-call frequencies.** (A) Frequency spectrum of the green treefrog advertisement call overlaid on a heatmap showing lung-mediated effects on tympanic sensitivity (redrawn from Fig. 2C and rotated 90° clockwise). The spectrum consists of two prominent spectral components, a low-frequency peak (834 Hz, black triangle) and a high-frequency peak (2730 Hz, white triangle) separated by a prominent valley in the spectrum centered at 1653 Hz (gray triangle). The thick black line and shaded gray area depict the mean  $\pm$  1 SD call spectrum ( $n = 23$  males, 457 individual calls). The dashed lines and shaded box enclose frequencies between 1400 Hz and 2200 Hz across all angles. (B, C) Polar plots showing the mean  $\pm$  95% CI difference (in dB) in the tympanum's response between the inflated and deflated conditions (inflated – deflated) at the frequencies of the two spectral components of conspecific calls. The 95% CIs included 0 dB at all angles of sound incidence.

**Figure 4**

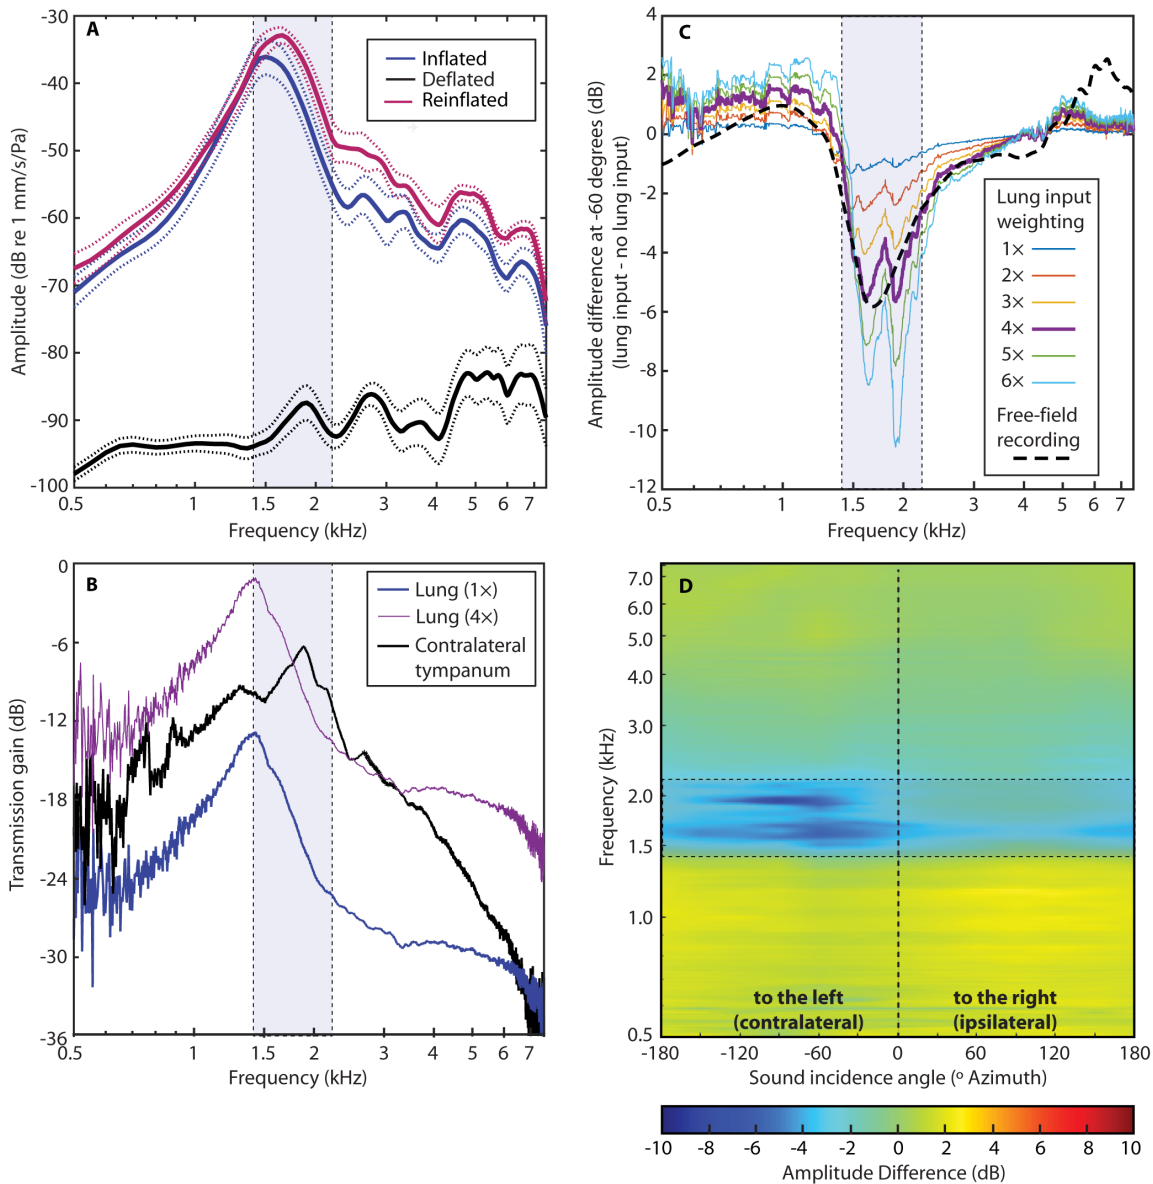

**Fig. 4. Lung resonance generates a tympanic notch filter. (A)** Under free-field acoustic stimulation by an FM sweep, the inflated lungs of green treefrogs resonate at frequencies between 1200 to 1900 Hz. Depicted here are the mean (solid lines;  $n = 10$  individuals)  $\pm$  95% CIs (dashed curves) vibration amplitudes of the body wall above the right lung in the inflated, deflated, and reinflated conditions. **(B)** Transmission gain of indirect sound input to the internal surface of the ipsilateral tympanum from the lungs ( $TG_L$ , with 1 $\times$  and 4 $\times$  transmission gain weightings) and contralateral tympanum ( $TG_C$ ) measured under conditions of local acoustic stimulation by an FM sweep (Fig. S1C). **(C)** Predicted effects of inflated lungs based on reconstructing the tympanum's free-field response at a contralateral sound incidence angle of  $-60^\circ$  using measures of transfer functions obtained under conditions of local acoustic stimulation by an FM sweep. Differences between reconstructed tympanum responses for the inflated and deflated conditions are shown for six transmission gain weightings (1 $\times$  to 6 $\times$ ) of the lung input to

account for the fact that the lungs would be stimulated to a much larger degree under free-field acoustic conditions. The actual impacts of the lung on the tympanum's free-field response are shown by the dashed black line (redrawn from the  $-60^\circ$  contour in the heatmap in Fig. 2C), which closely matches the predicted response for a lung transmission gain weighting of  $4\times$ . **(D)** Predicted effects of inflated lungs on the tympanum's free-field response at all angles of sound incidence based on measures of transfer functions under conditions of local acoustic stimulation by an FM sweep and using a lung input weighting of  $4\times$ . In all panels **(A-D)**, the dashed lines and shaded blue rectangle enclose frequencies between 1400 Hz and 2200 Hz.

**Figure 5**

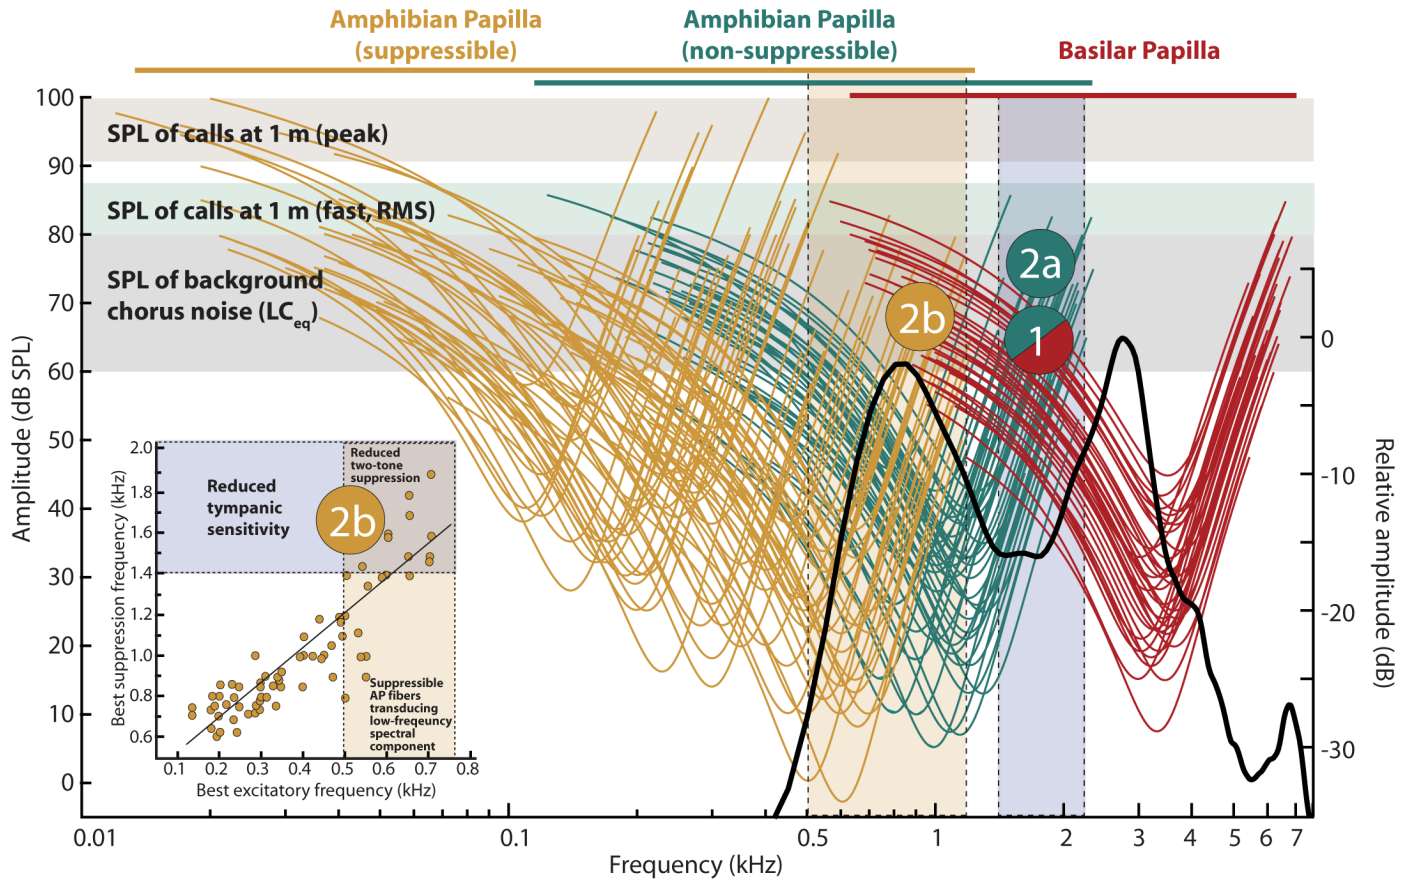

**Fig. 5. Lung mediated notch filtering sharpens peripheral frequency tuning and reduces energetic masking and two-tone rate suppression.** Modeled tuning curves for 172 auditory nerve fibers in green treefrogs are shown in relation to the frequency range of lung-mediated reductions in tympanum sensitivity (1400 to 2200 Hz, right shaded blue rectangle), the spectrum of conspecific calls (solid black line redrawn from Fig. 3A), and the sound pressure levels (SPLs) of conspecific advertisement calls (49) and background chorus noise for a closely-related treefrog (50). Tuning curves are depicted separately for low-frequency and mid-frequency fibers innervating the amphibian papilla (AP) and for high-frequency fibers innervating the basilar papilla (BP). Neural responses of low-frequency fibers innervating the AP can be suppressed by frequencies in the range of mid-frequency AP fibers (36). The inset shows the best suppression frequency for a given best excitatory frequency for 70 auditory nerve fibers derived from the AP having best excitatory frequencies at or below approximately 700 Hz (redrawn from (36)). The greatest two-tone suppression of excitatory responses to a tone presented 10 dB above threshold at a unit's best excitatory frequency was observed when a second tone was simultaneously presented at the unit's best suppression frequency. As the modeled tuning curves illustrate, nerve fibers with best excitatory frequencies in the range of 0.5 to 0.7 kHz transduce the low-frequency spectral component of conspecific calls at the high sound amplitudes used for communication (left shaded gold rectangle). Approximately half of the nerve fibers with best excitatory frequencies within this range can be suppressed by sound energy in the range of 1400 Hz to 1900 Hz. The model predicts two mechanisms by which a reduced tympanum response to frequencies

between 1400 Hz and 2200 Hz is expected to improve sensory processing of conspecific calls. Reduced stimulation by environmental noise of both non-suppressible AP fibers and BP fibers at frequencies where their tuning overlaps ('1') would reduce energetic masking of both spectral components in conspecific calls. Reduced stimulation of non-suppressible AP fibers ('2a') would additionally reduce two-tone rate suppression of high-frequency, suppressible AP fibers ('2b') that transduce the low-frequency component of the call.

Figure 6

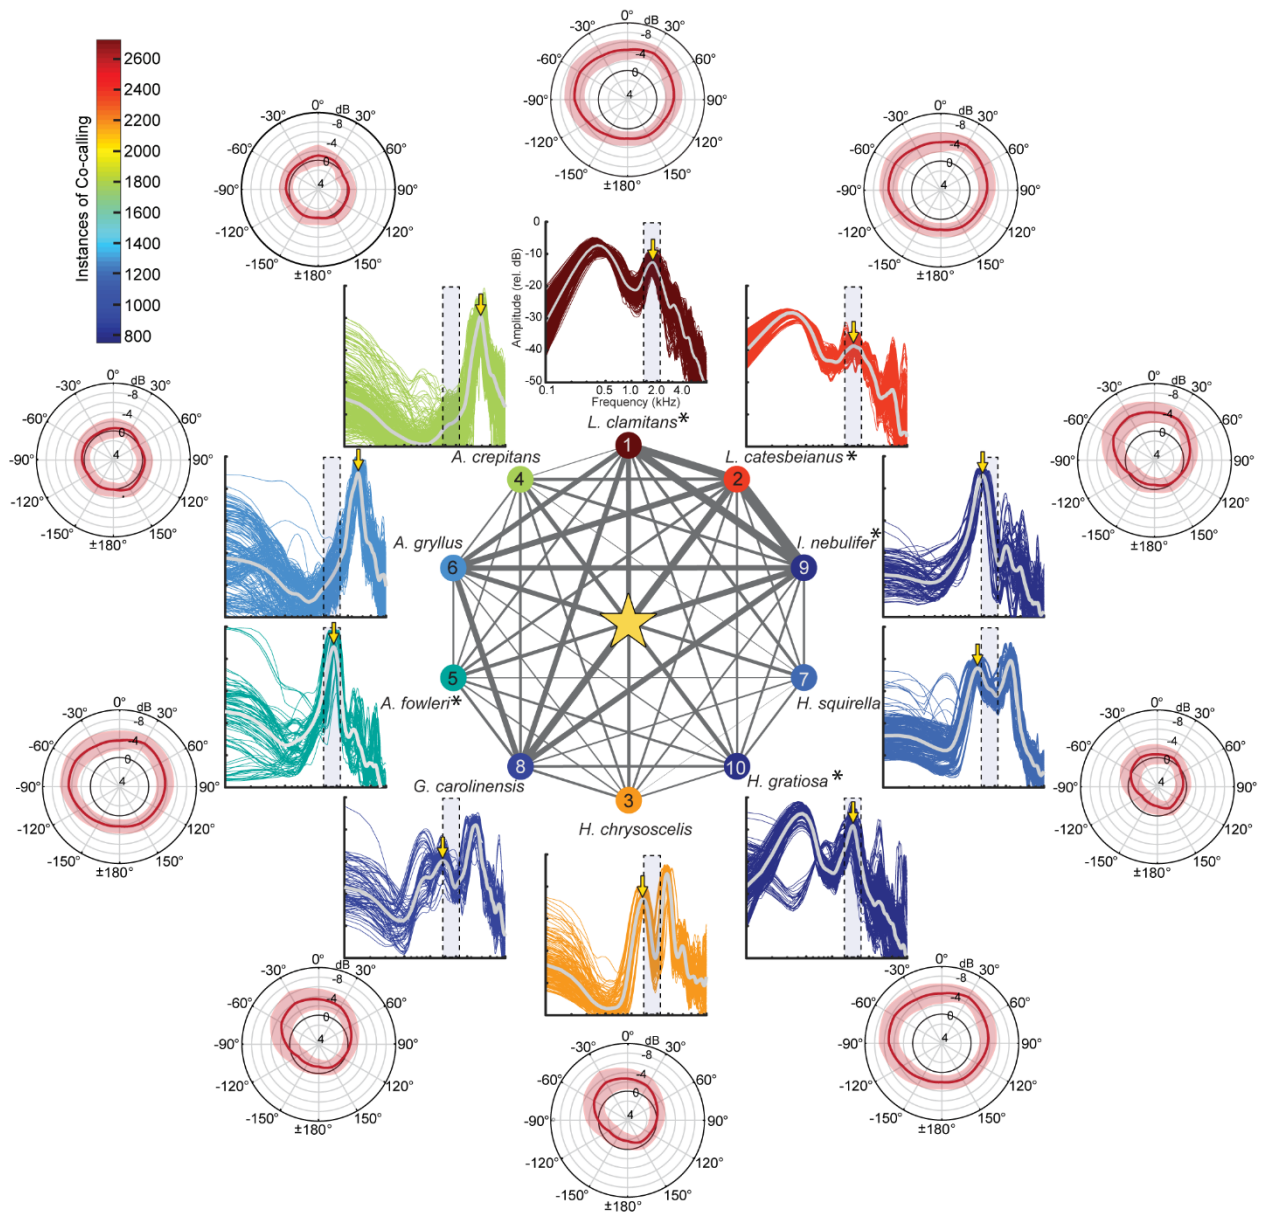

**Fig. 6. Lung mediated notch filtering improves the signal-to-noise ratio for communication by reducing the tympanum's response to environmental noise.** The central figure depicts the social network of co-calling between green treefrogs (star) and the top-10 heterospecific species identified from the NAAMP dataset (Fig. S3). Network edges reflect the relative number of observations of co-calling. Five of the top-10 species produce calls with substantial acoustic energy in the range of reduced tympanum vibration amplitude (asterisks; Table S1). Surrounding the network are depictions of the frequency spectra of each heterospecific species' advertisement calls. Gray lines depict the mean spectrum, averaged over all individuals and calls; colored lines depict the spectrum for each analyzed call and are scaled in color according to the instances of co-calling with green treefrogs (color bar). The shaded blue rectangle in each spectrum represents the frequency range of maximal reduction in the green treefrog's tympanum vibration



amplitude (1400 to 2200 Hz) as a result of lung inflation. Surrounding the spectra are polar plots depicting the mean  $\pm$  95% CI difference (in dB) in the tympanum's response between the inflated and deflated conditions (inflated – deflated) at the frequency indicated by a downward pointing yellow arrow on each spectrum ( $n = 21$  individuals).

**Table S1. Lung-mediated reductions in the tympanum's response to frequencies in heterospecific calls**

| Species                        | Sound     | Amplitude      |          |          |    |
|--------------------------------|-----------|----------------|----------|----------|----|
|                                | incidence | reduction (dB) | <i>t</i> | <i>p</i> | df |
| <i>Lithobates clamitans</i>    | 0°        | 4.4 ± 2.0      | 4.38     | < 0.001  | 20 |
|                                | -30°      | 4.6 ± 2.2      | 3.98     | 0.001    | 20 |
|                                | -60°      | 5.4 ± 2.2      | 4.90     | < 0.001  | 20 |
| <i>Lithobates catesbeianus</i> | 0°        | 4.0 ± 1.9      | 4.06     | 0.001    | 20 |
|                                | -30°      | 4.2 ± 2.2      | 3.70     | 0.001    | 20 |
|                                | -60°      | 5.0 ± 2.1      | 4.76     | < 0.001  | 20 |
| <i>Incilius nebulifer</i>      | 0°        | 4.0 ± 2.0      | 3.83     | 0.001    | 20 |
|                                | -30°      | 4.5 ± 2.6      | 3.43     | 0.003    | 20 |
|                                | -60°      | 3.8 ± 2.5      | 3.01     | 0.007    | 20 |
| <i>Anaxyrus fowleri</i>        | 0°        | 3.6 ± 1.9      | 3.63     | 0.002    | 20 |
|                                | -30°      | 3.8 ± 2.2      | 3.39     | 0.003    | 20 |
|                                | -60°      | 4.6 ± 2.1      | 4.43     | < 0.001  | 20 |
| <i>Hyla gratiosa</i>           | 0°        | 4.4 ± 2.0      | 4.38     | < 0.001  | 20 |
|                                | -30°      | 4.6 ± 2.2      | 3.98     | 0.001    | 20 |
|                                | -60°      | 5.4 ± 2.2      | 4.90     | < 0.001  | 20 |

Mean (± 95% CI) reduction in tympanum amplitude vibration as a result of lung inflation in response to the spectral component in or closest to the range of 1400 to 2200 Hz in five heterospecific species' advertisement calls in the frontal field (0°) or in the contralateral field (-30° and -60°) relative to the position of the measurement laser. The species included here represent the five species from among the top-10 co-callers for which the benefit to green treefrogs of lung-mediated reductions in tympanum vibration amplitude would be most pronounced. These co-callers produce advertisement calls with substantial acoustic energy in the frequency range of 1400 to 2200 Hz and frequently co-occur with green treefrogs according to the North American Amphibian Monitoring Program dataset (Fig. 6; Fig. S3). Statistical results are from two-tailed, one-sample t-tests (*n* = 21 individuals).

800

Figure S1

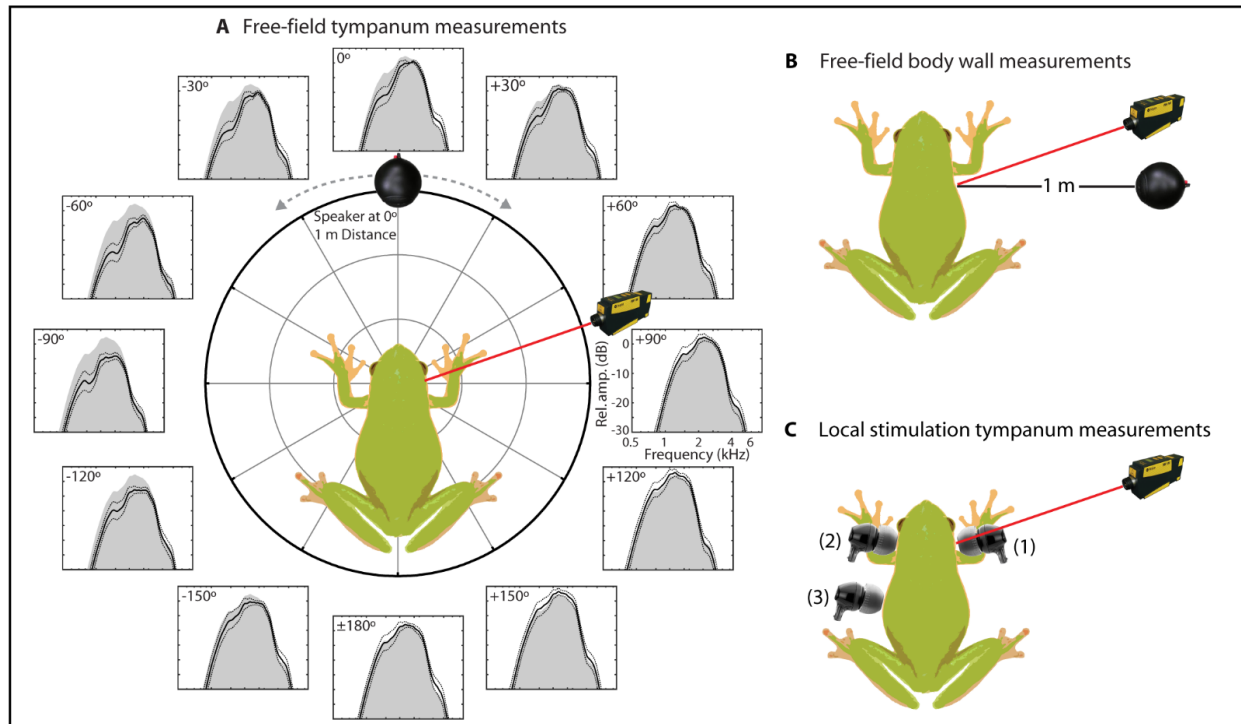

**Fig. S1. Laser vibrometry was used to measure the vibration amplitudes of the right tympanum and right body wall overlying the lung in response to acoustic stimulation. (A)** The frequency spectrum of the vibration amplitude of the right tympanum was measured under free-field acoustic conditions in response to an FM sweep presented at each of 12 sound incidence angles ( $0^\circ$  to  $\pm 180^\circ$  in  $30^\circ$  steps) surrounding the animal from a speaker located 1 m away. These measurements were used to determine the impacts of the lungs on the tympanum's response under conditions of free-field acoustic stimulation. *Insets:* Spectra show the tympanum's mean (solid black line)  $\pm 1$  SD (dashed black lines) relative vibration amplitude as a function of frequency and sound incidence angle; the shaded gray area corresponds to the spectrum at  $+90^\circ$  and is reproduced for comparison purposes at all other angles of sound incidence. **(B)** The frequency spectrum of the vibration amplitude of the right body wall overlying the lung was measured under free-field acoustic conditions in response to an FM sweep presented from a speaker located 1 m away at an ipsilateral ( $+90^\circ$ ) angle of sound incidence. These measurements were used to determine the resonance frequency of the lungs under conditions of free-field acoustic stimulation. **(C)** Local acoustic stimulation of the ipsilateral (to the laser) tympanum (1), the contralateral tympanum (2), and the contralateral body wall (3) was used to generate quantitative measures of the transmission gain of indirect sound input to the internal surface of the ipsilateral tympanum via the lungs and the contralateral tympanum. The laser used for measurements was always located at to the frog's right side at an angle of  $+70^\circ$  relative to the snout (at  $0^\circ$ ).

**Figure S2**

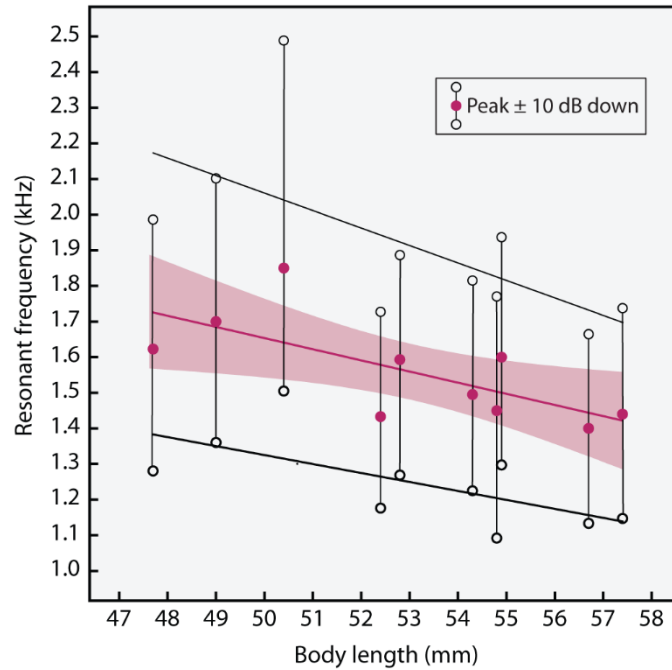

**Fig. S2. Frog lungs are size-dependent resonators.** Under free-field acoustic stimulation by an FM sweep, the inflated lungs of green treefrogs exhibit a size-dependent resonance. Filled circles depict, as a function of body length, the mean peak resonance frequency of the body wall overlying the right lung in response to free-field acoustic stimulation by an FM sweep and measured using laser vibrometry. Open circles connected to each peak frequency represent the  $\pm 10$ -dB down points on the resonance spectrum measured relative to the amplitude of the peak frequency. The colored line is the best-fit regression line ( $\pm 95\%$  CIs) for the peak frequency; black lines depict best-fit lines for the upper or lower 10-dB down points.

Figure S3

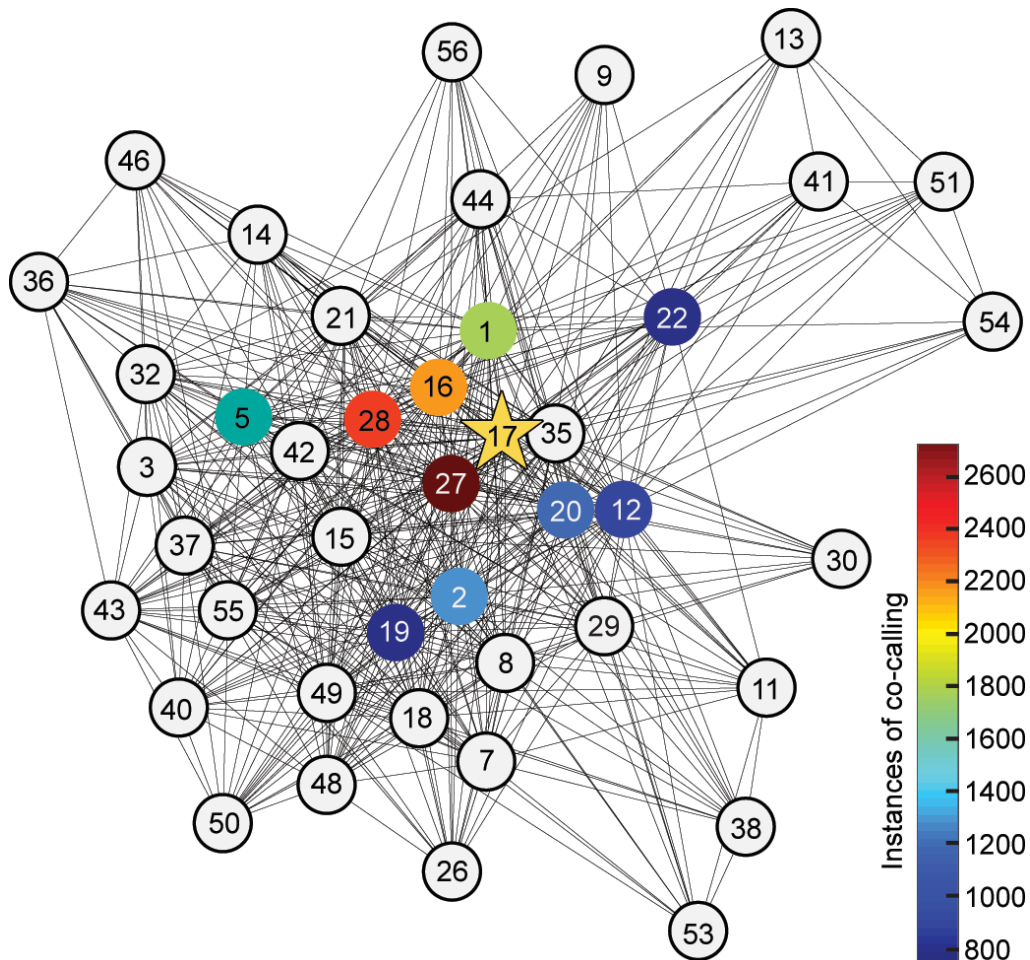

**Fig. S3. Social network analysis of data from the North American Amphibian Monitoring Program (NAAMP) identified 42 heterospecific, co-calling species.** Using network analysis, we determined the incidence of “co-calling” between green treefrogs and other calling frog species in the NAAMP dataset. Green treefrogs were present on 9245 (2.9%) of the observations in the NAAMP dataset. Within these observations, a total of 42 heterospecific species co-called with green treefrogs. The top-ten co-callers are indicated by colored circles, with the number of observations of co-calling for each species (out of 19,809 total co-calling observations) depicted by the color map. The species identity for each numbered node is as follows: 1 *Acris crepitans*, 2 *Acris gryllus*, 3 *Anaxyrus americanus*, 5 *Anaxyrus fowleri*, 7 *Anaxyrus quercicus*, 8 *Anaxyrus terrestris*, 9 *Eleutherodactylus cystignathoides*, 11 *Eleutherodactylus planirostris*, 12 *Gastrophryne carolinensis*, 13 *Gastrophryne olivacea*, 14 *Hyla andersonii*, 15 *Hyla avivoca*, 16 *Hyla chrysoscelis*, 17 *Hyla cinerea*, 18 *Hyla femoralis*, 19 *Hyla gratiosa*, 20 *Hyla squirella*, 21 *Hyla versicolor*, 22 *Incilius nebulifer*, 26 *Lithobates capito*, 27 *Lithobates catesbeianus*, 28 *Lithobates clamitans*, 29 *Lithobates grylio*, 30 *Lithobates heckscheri*, 32 *Lithobates palustris*, 35 *Lithobates sphenoccephalus*, 36 *Lithobates sylvaticus*, 37 *Lithobates virgatipes*, 38 *Osteopilus septentrionalis*, 40 *Pseudacris brimleyi*, 41 *Pseudacris clarkii*, 42 *Pseudacris crucifer*, 43 *Pseudacris feriarum*, 44 *Pseudacris fouquettei*, 46 *Pseudacris kalmi*, 48 *Pseudacris nigrita*, 49 *Pseudacris ocularis*, 50 *Pseudacris ornata*, 51 *Pseudacris streckeri*, 53 *Rhinella marina*, 54 *Scaphiopus couchii*, 55 *Scaphiopus holbrookii*, 56 *Scaphiopus hurterii*, 57 *Spea bombifrons*.
